# Supplementary material for: A Novel and Highly Regioselective Synthesis of New Carbamoylcarboxylic Acids from Dianhydrides
Source: Hindawi journal article supplement (doi:10.1155/2014/725981), 2014-01-01

## Supporting Information

### **A novel and highly regioselective synthesis of new carbamoylcarboxylic acids from dianhydrides**

Adrián Ochoa-Teran<sup>1\*</sup>, Jesús Estrada-Manjarrez<sup>2</sup>, Marisela Martínez-Quiroz<sup>1</sup>, Marco Antonio Landey-Álvarez<sup>1</sup>, Eleazar Alcántar Zavala<sup>3</sup>, Georgina Pina-Luis<sup>1</sup>, Hisila Santacruz-Ortega<sup>4</sup>, Luis Enrique Gómez-Pineda<sup>1</sup>, José Z. Ramírez<sup>4</sup>, Daniel Chávez<sup>1</sup>, Julio Montes Ávila<sup>3</sup>, Victoria Labastida-Galván<sup>5</sup> and Mario Ordoñez<sup>5</sup>

<sup>1</sup> Centro de Graduados e Investigación, Instituto Tecnológico de Tijuana. Tijuana, B. C., 22510, México.

<sup>2</sup> Departamento de Ingeniería Bioquímica, Instituto Tecnológico de Culiacán. Culiacán, Sin., 80220. México.

<sup>3</sup> Facultad de Ciencias Químico Biológicas, Universidad Autónoma de Sinaloa, Culiacán, Sin. 80010, México.

<sup>4</sup> Departamento de Polímeros y Materiales, Universidad de Sonora, Hermosillo, Son. 83000, México.

<sup>5</sup> Centro de Investigaciones Químicas, Universidad Autónoma del Estado de Morelos. Cuernavaca, Mor. 62209. México.

| <b>Content</b>                                  | <b>Page No.</b> |
|-------------------------------------------------|-----------------|
| II. Selected NMR spectra of compounds <b>3</b>  | <b>S2</b>       |
| III. Selected NMR spectra of compounds <b>6</b> | <b>S20</b>      |

# I. Selected NMR spectra of compounds 3

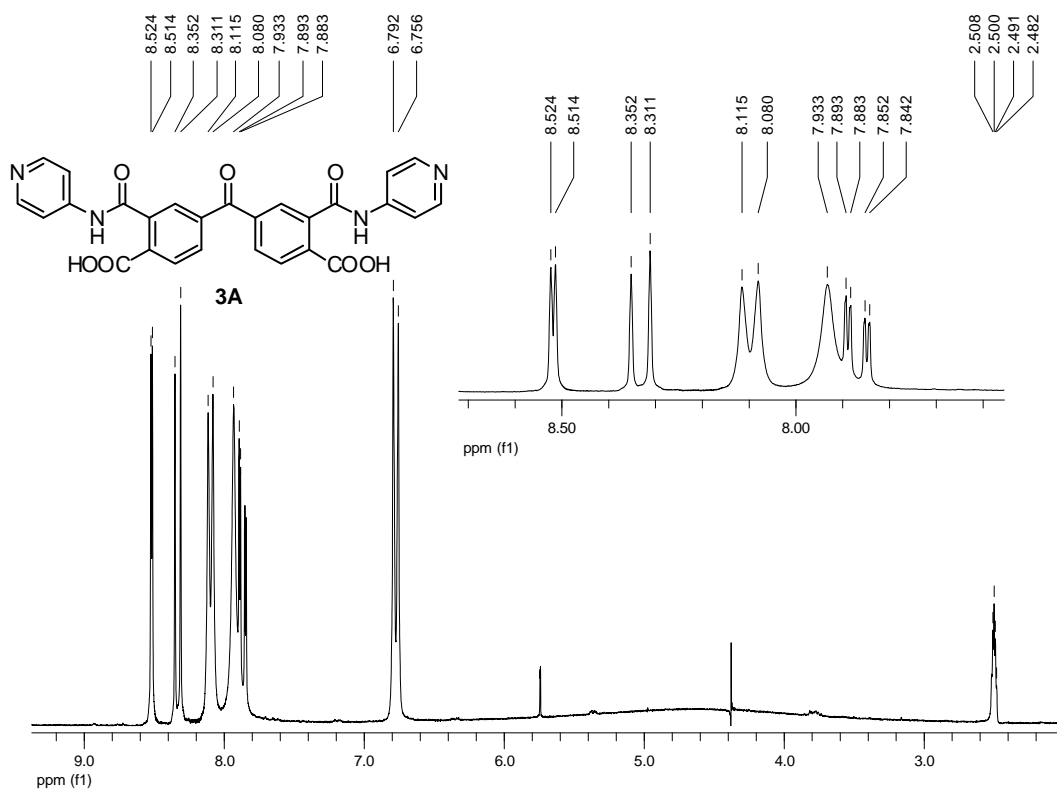

With two drops of D<sub>2</sub>O

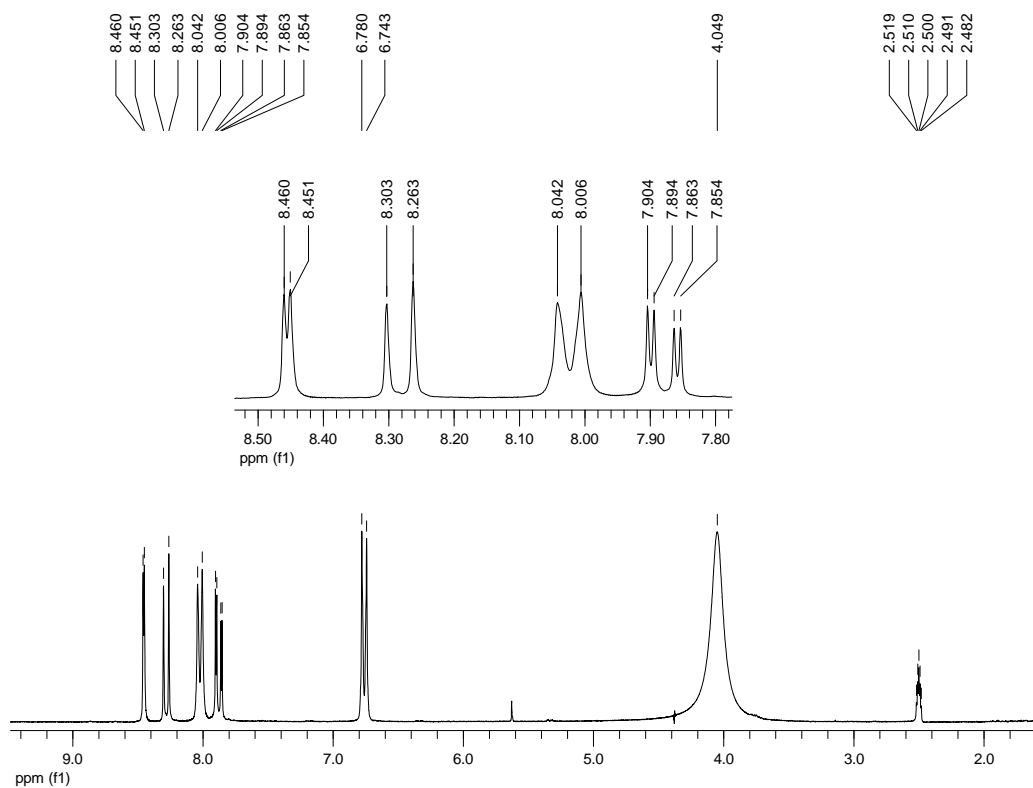

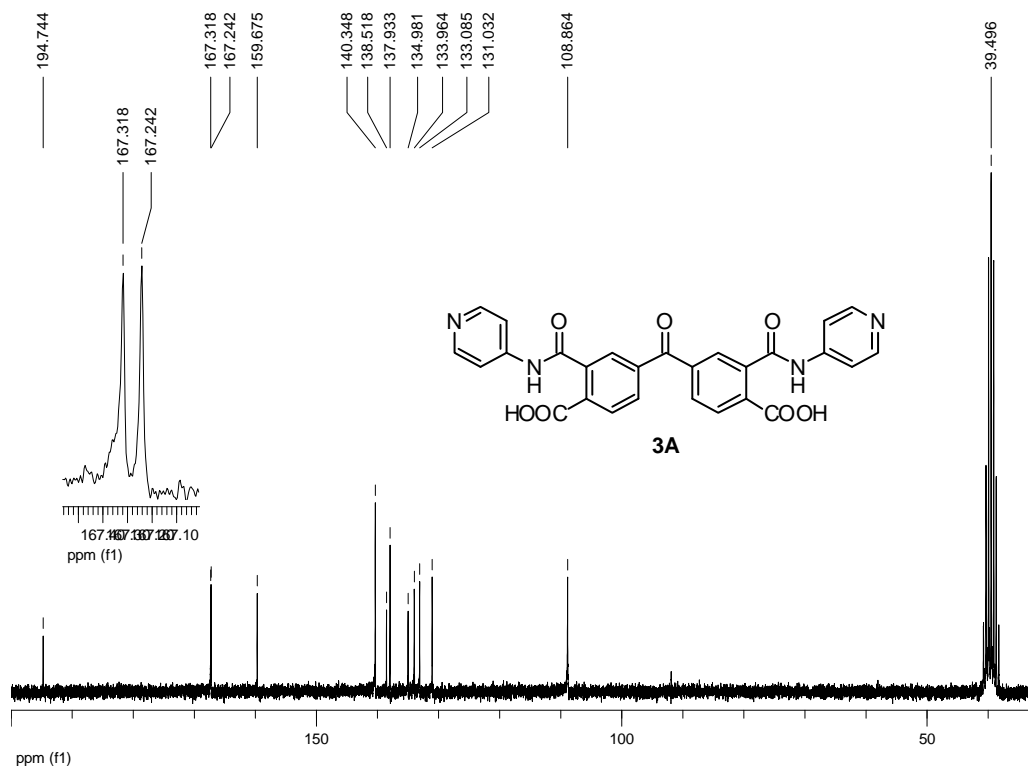

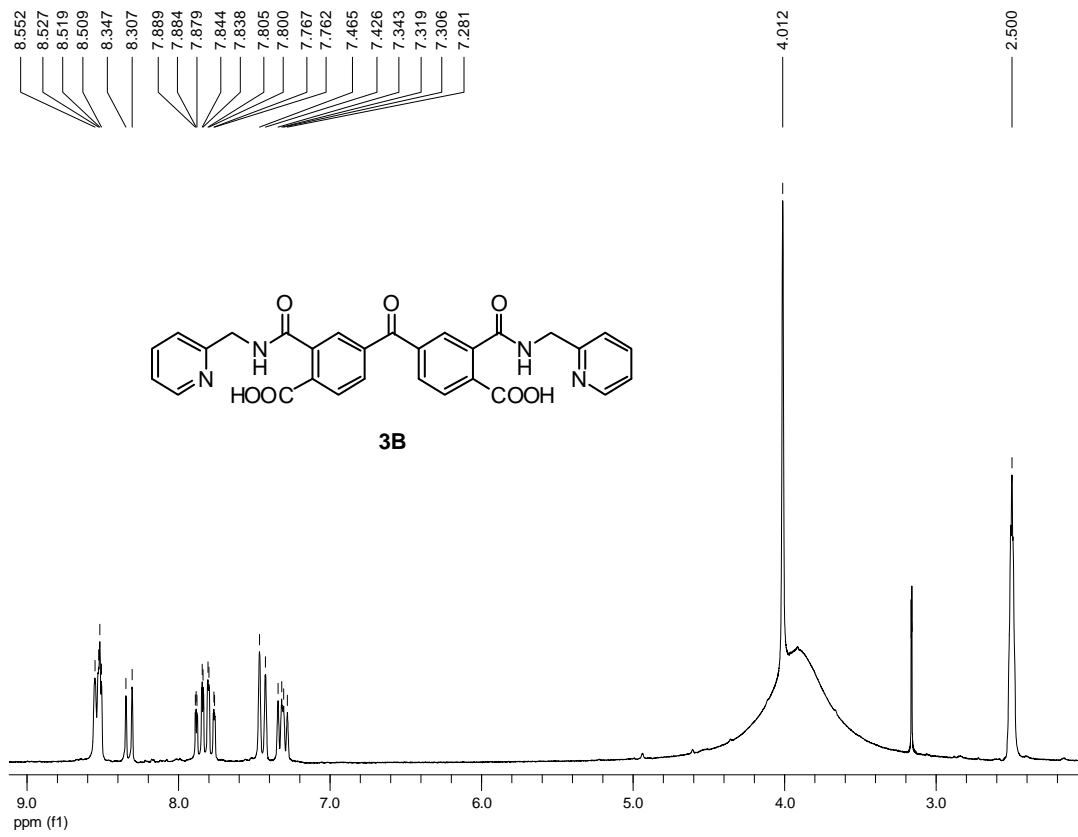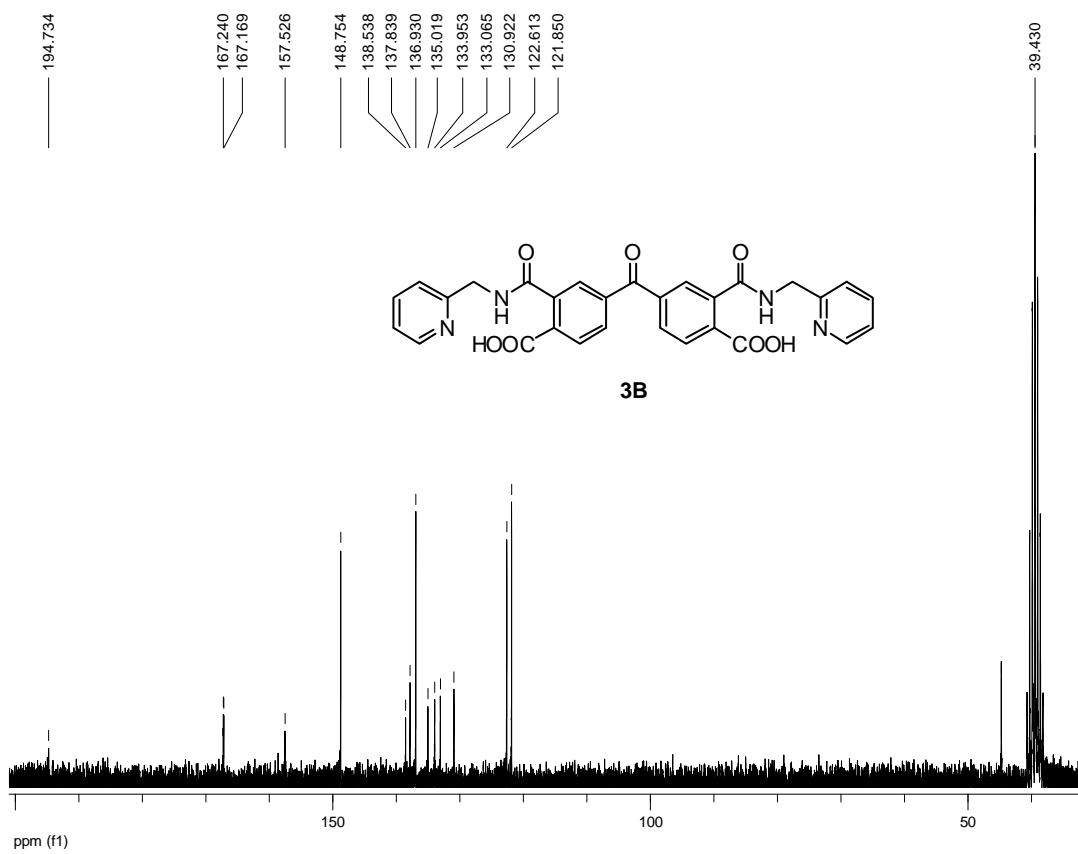

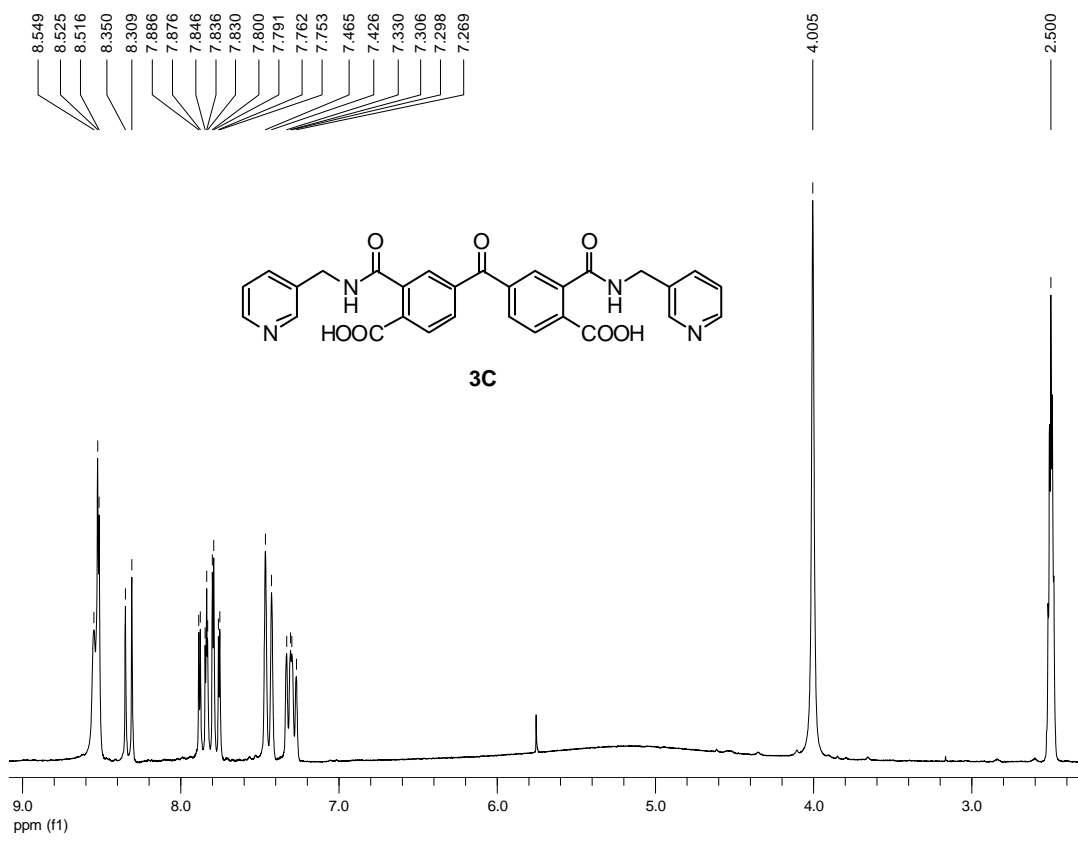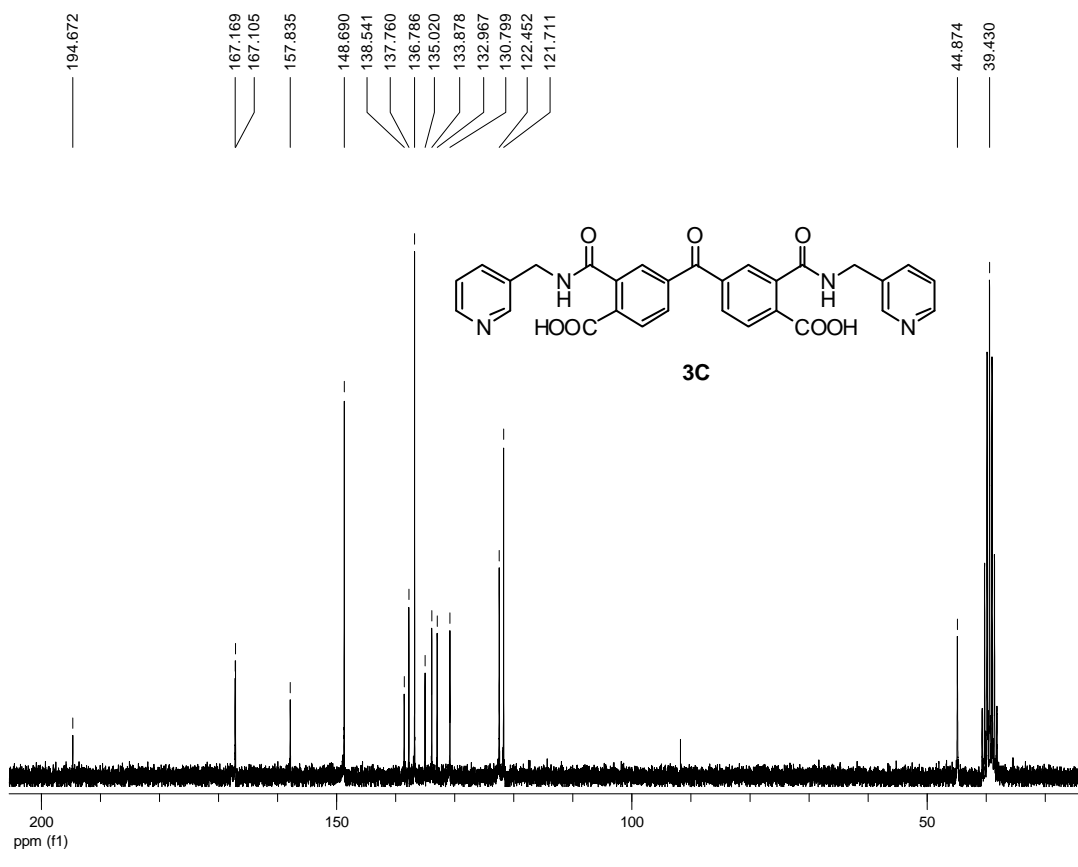

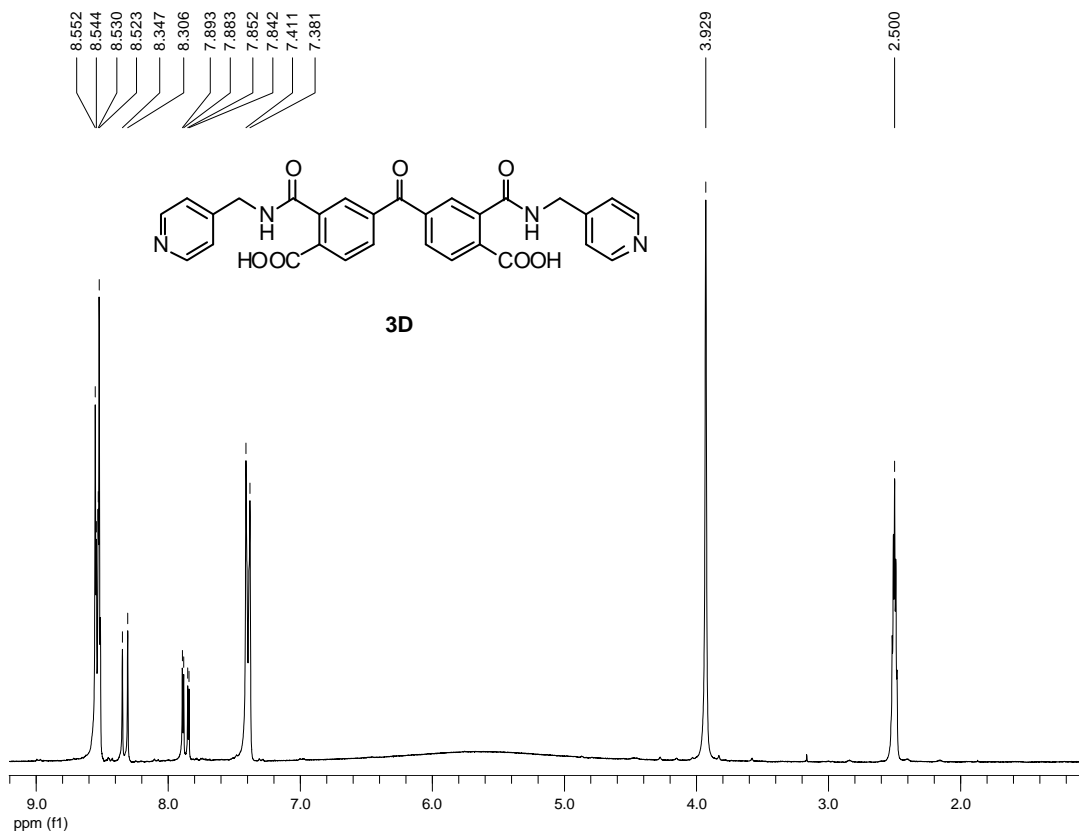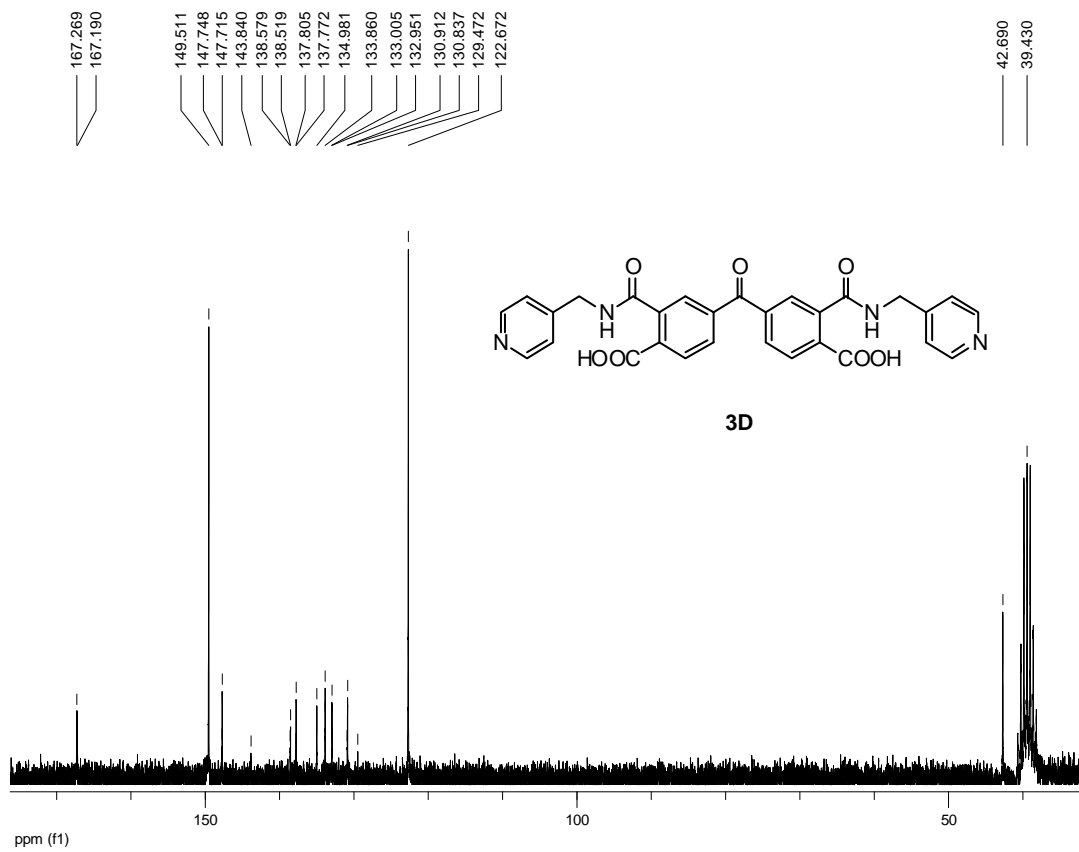

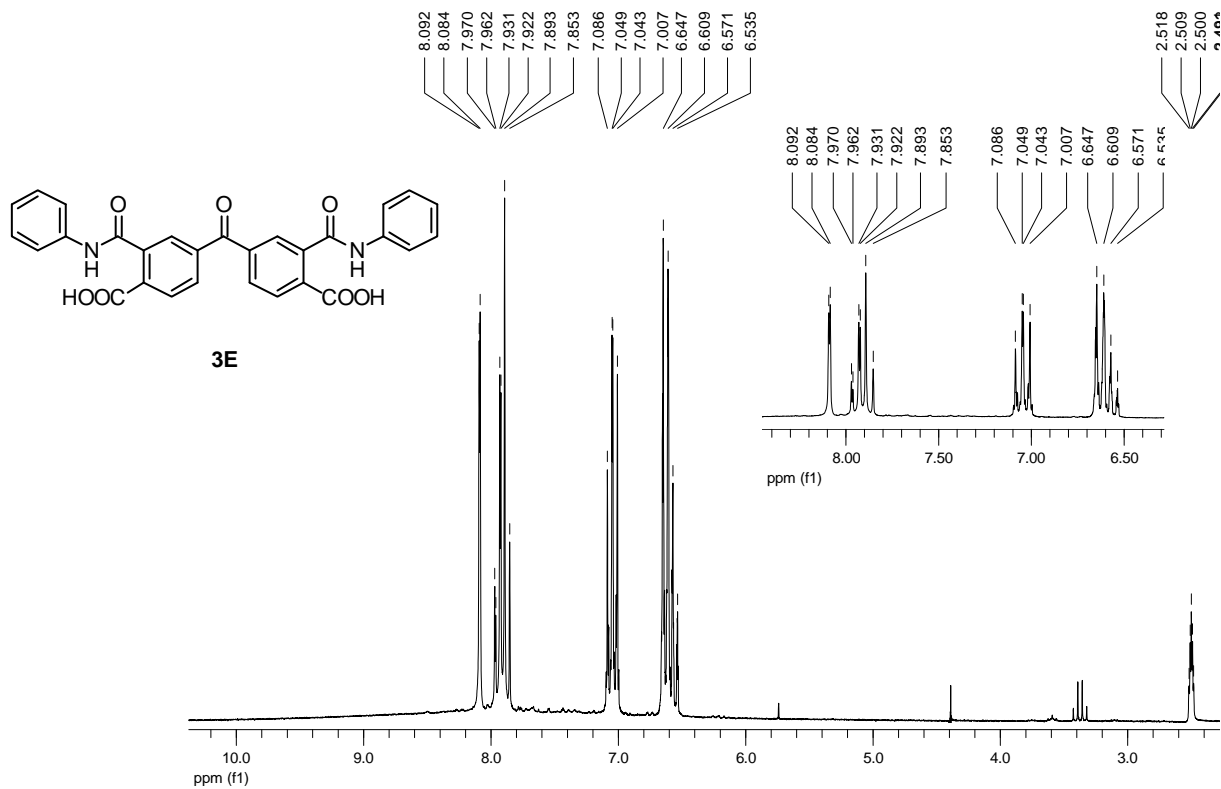

With one drop of D<sub>2</sub>O

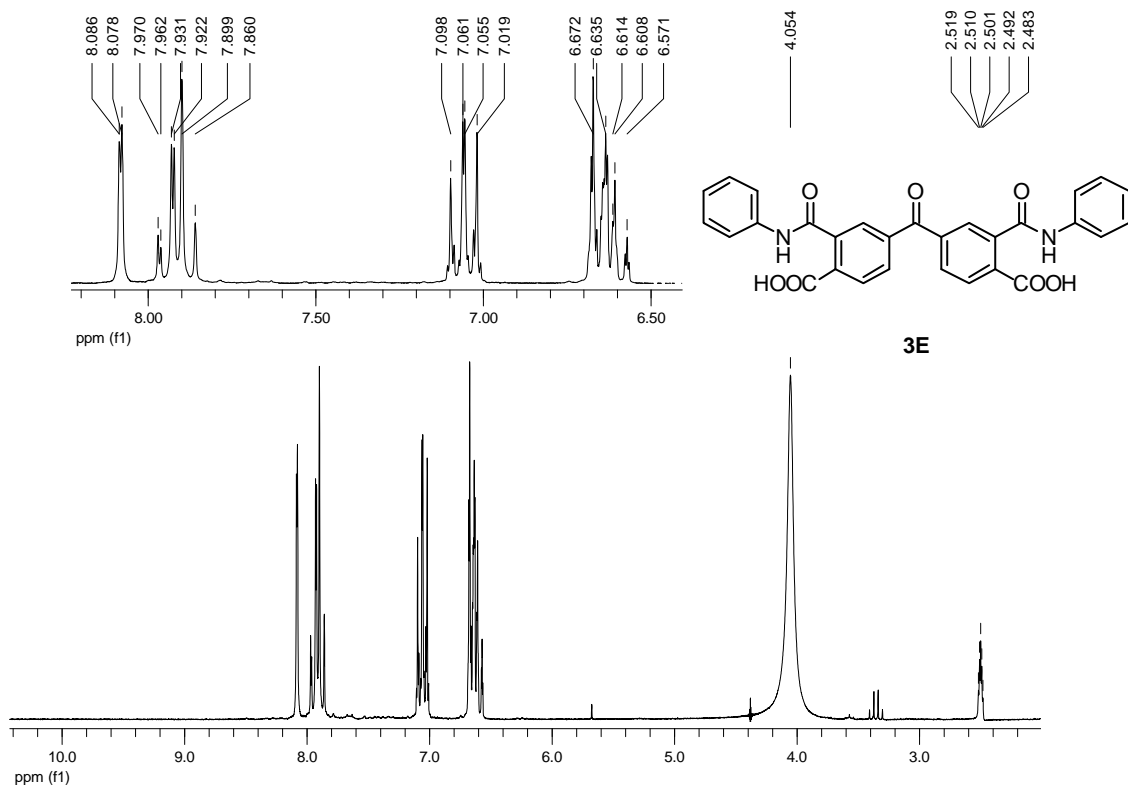

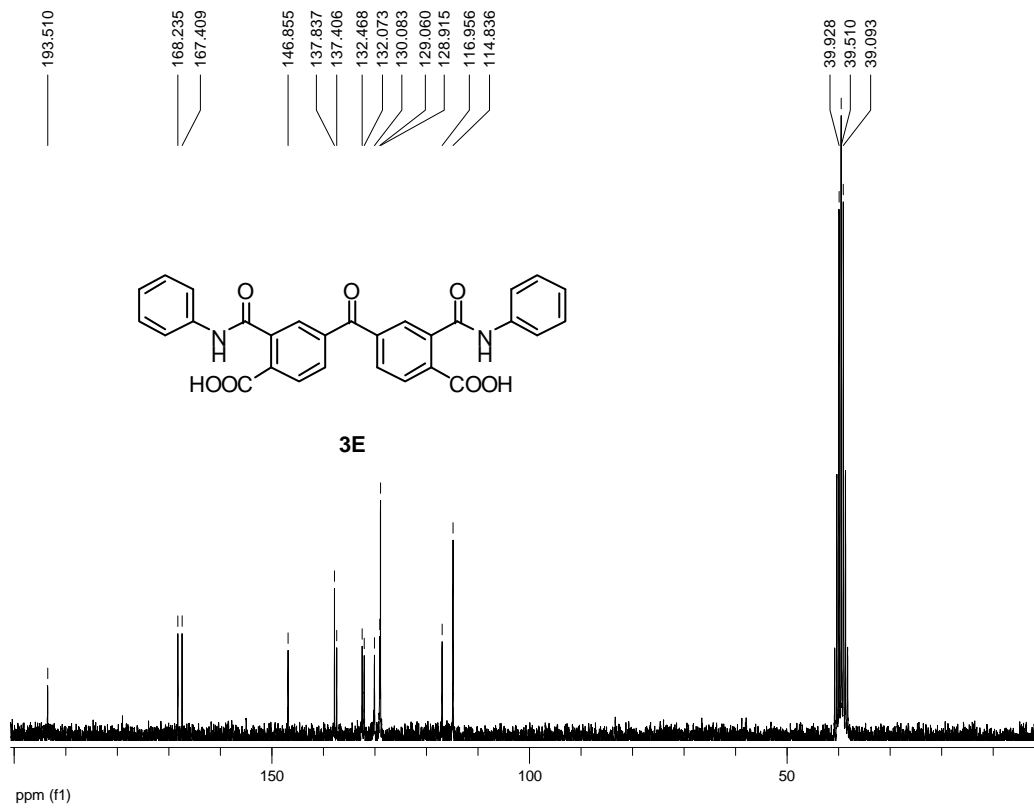



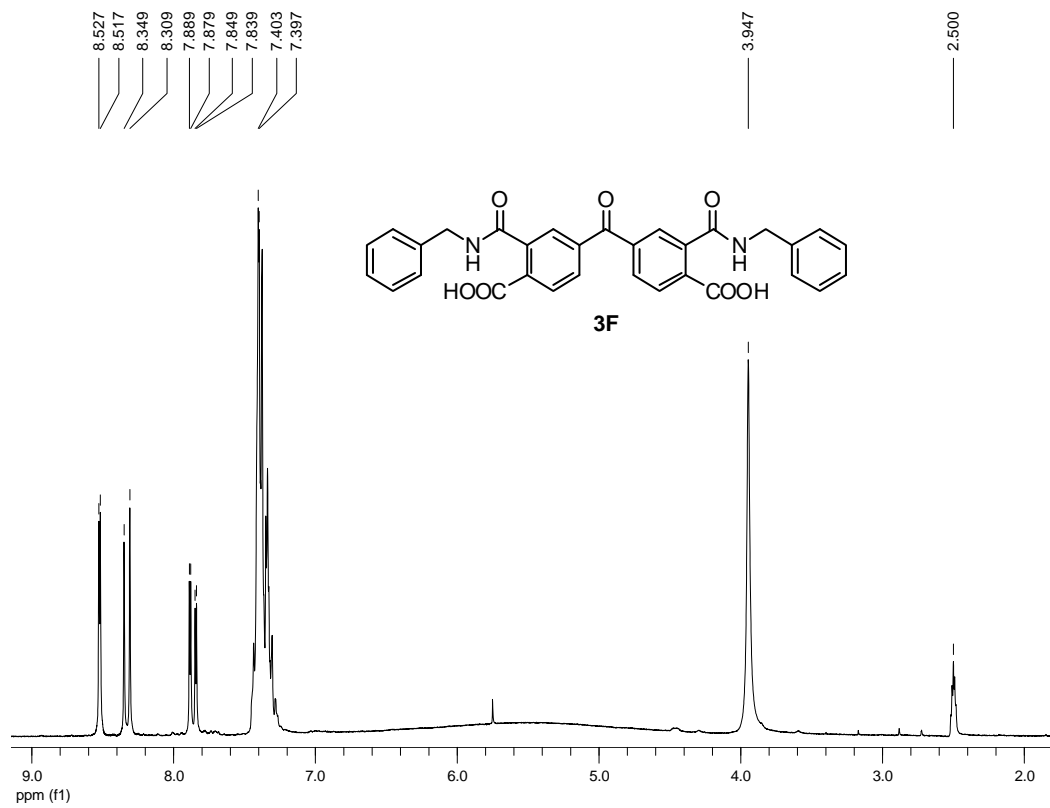

**With one drop of D<sub>2</sub>O**

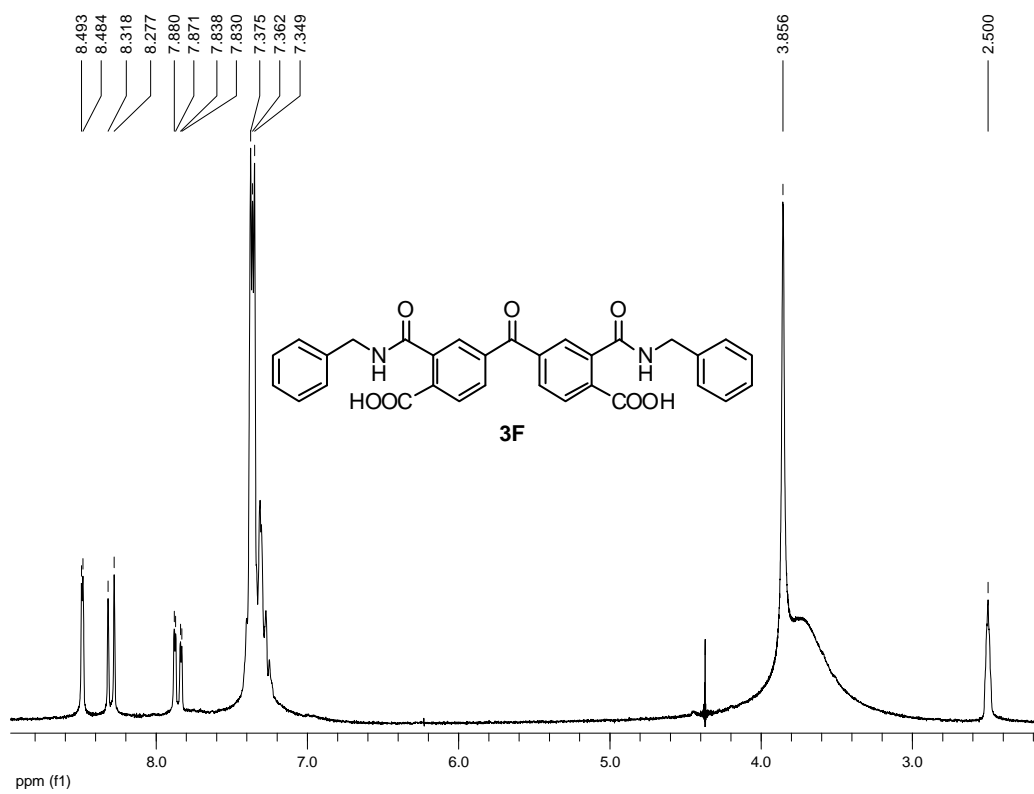

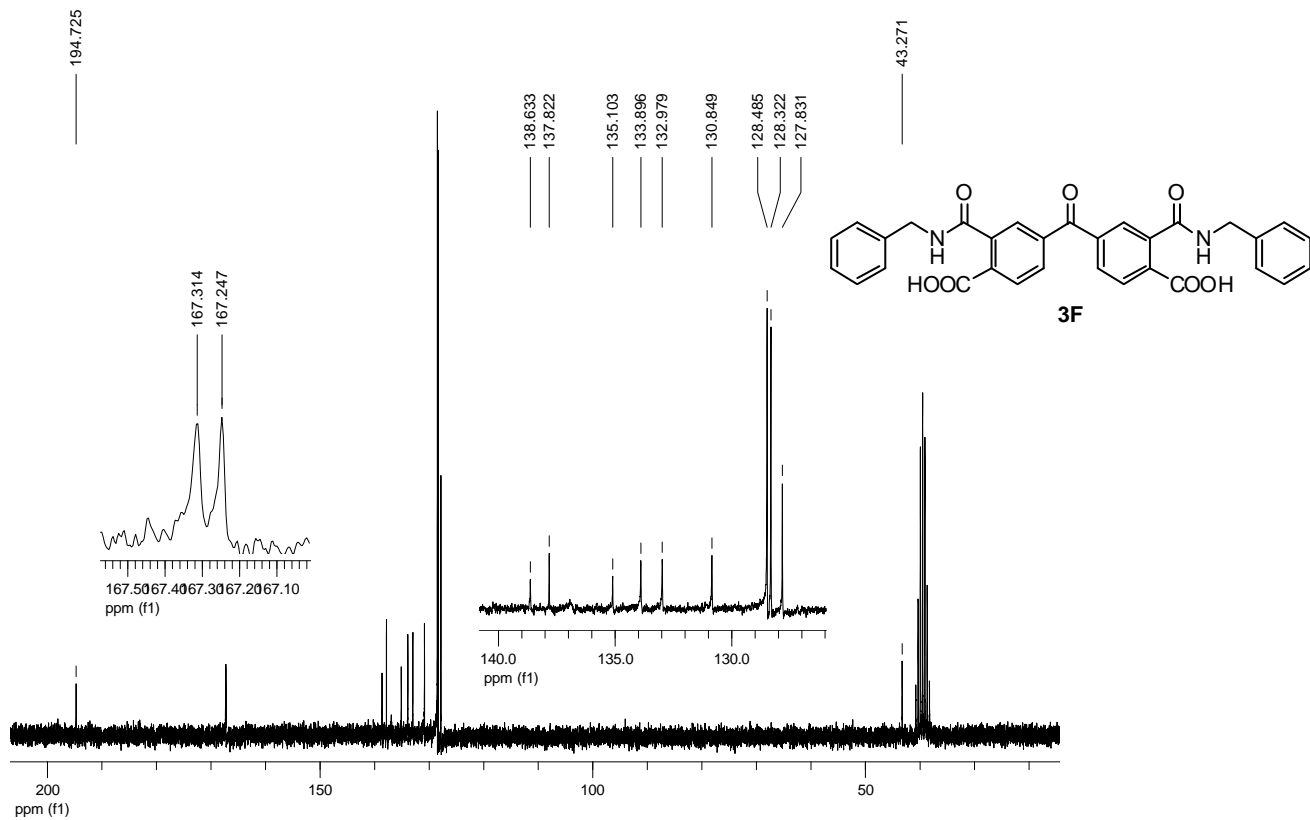

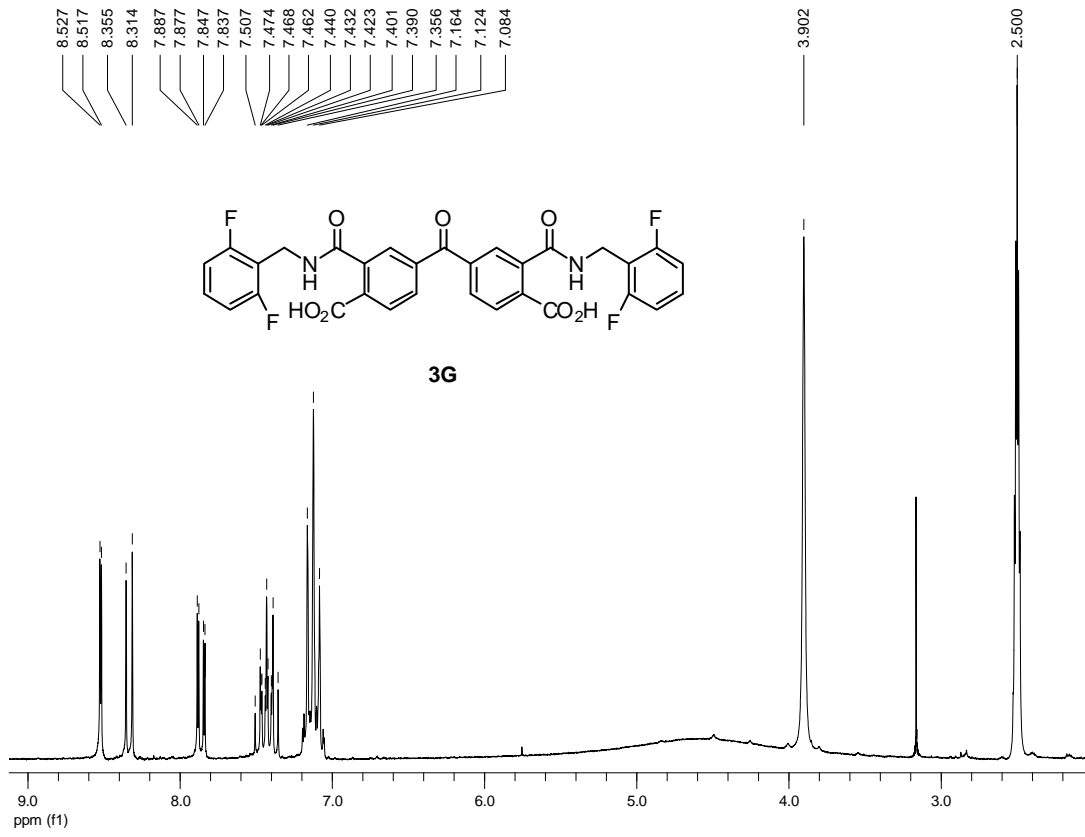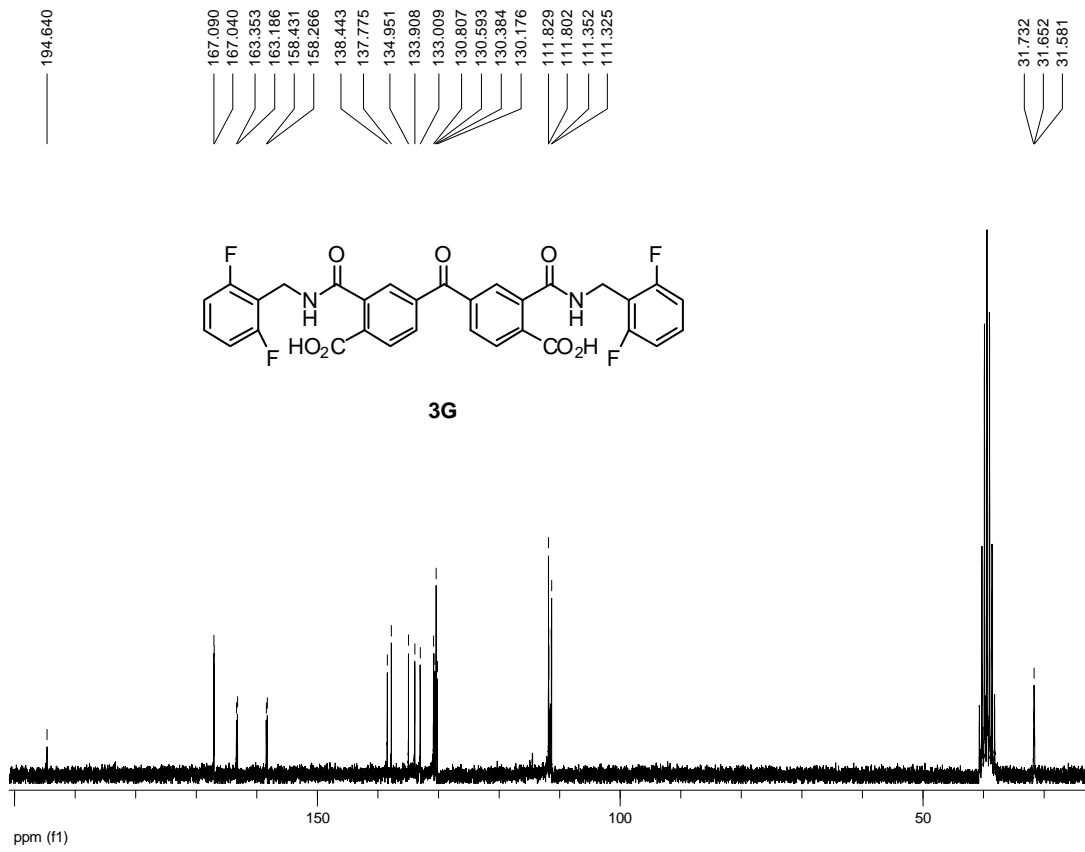

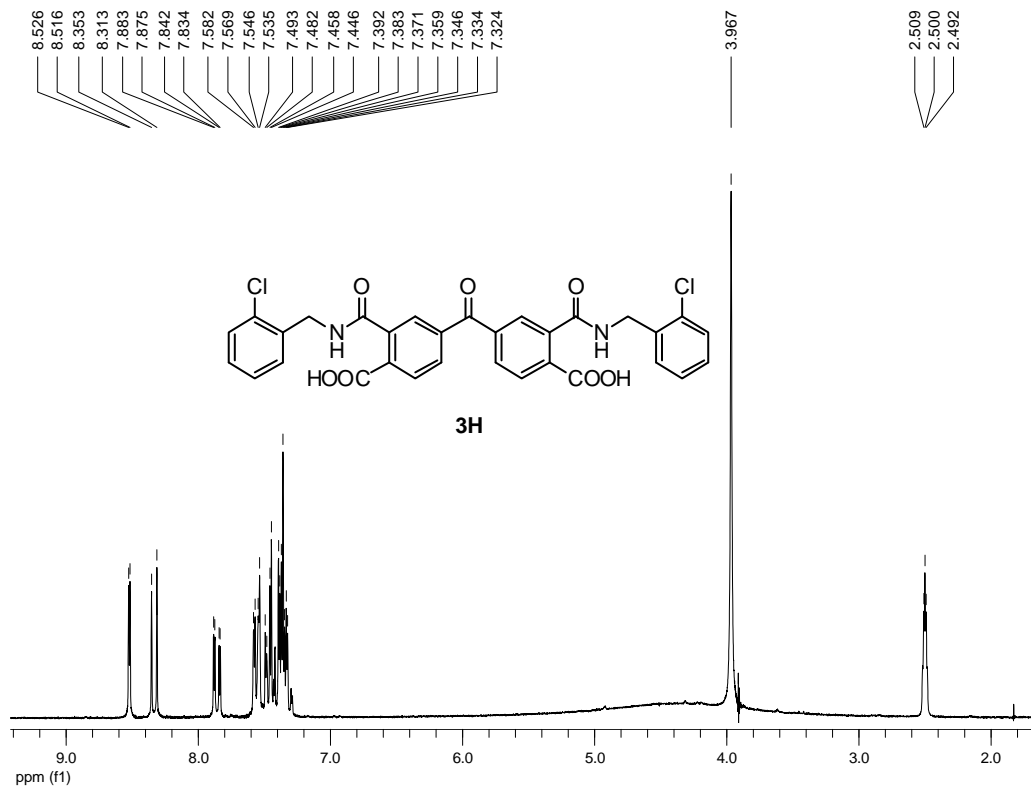

With two drops of D<sub>2</sub>O added

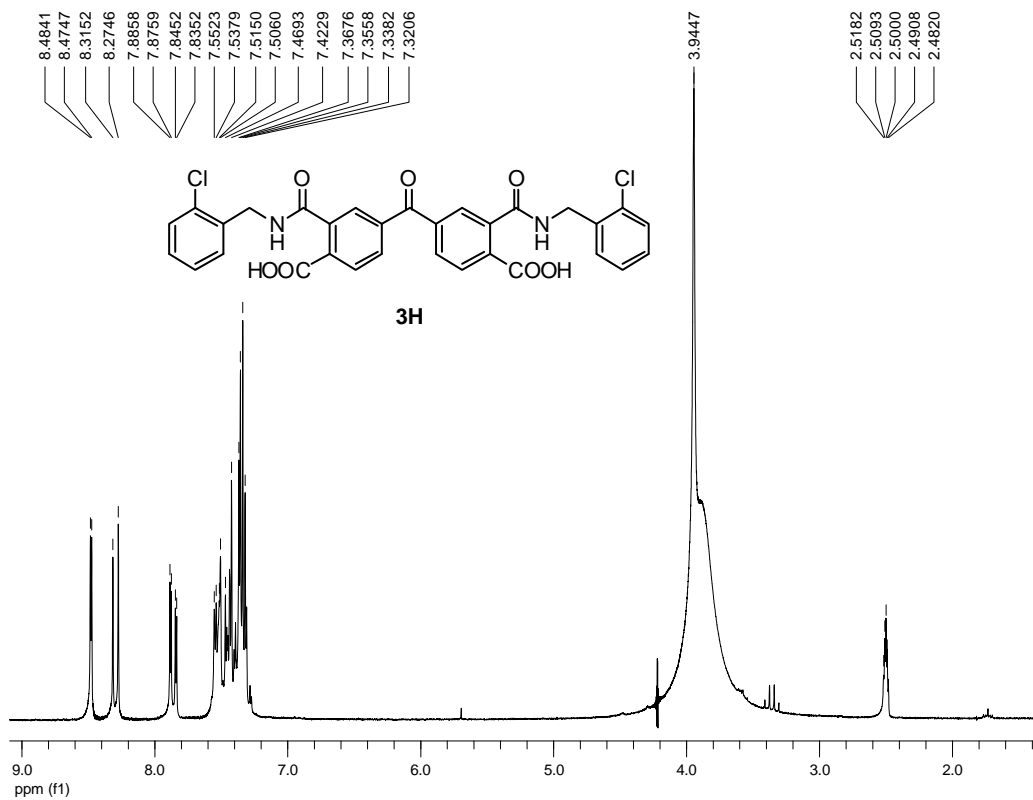

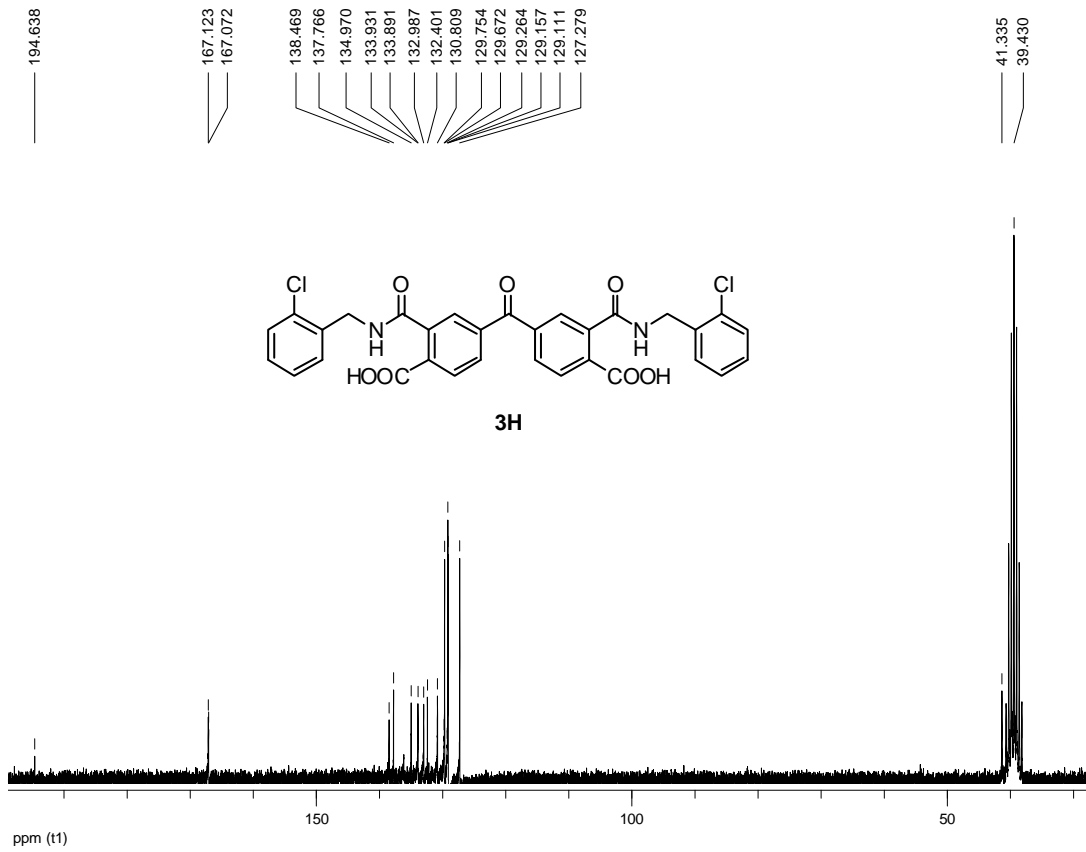

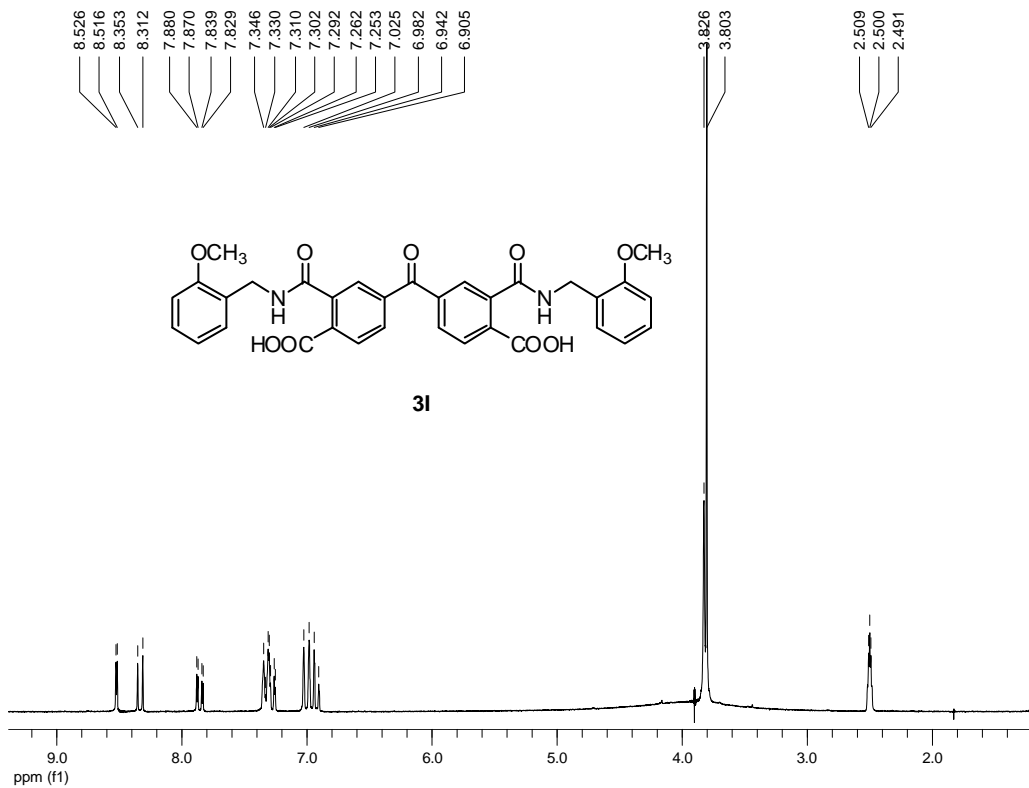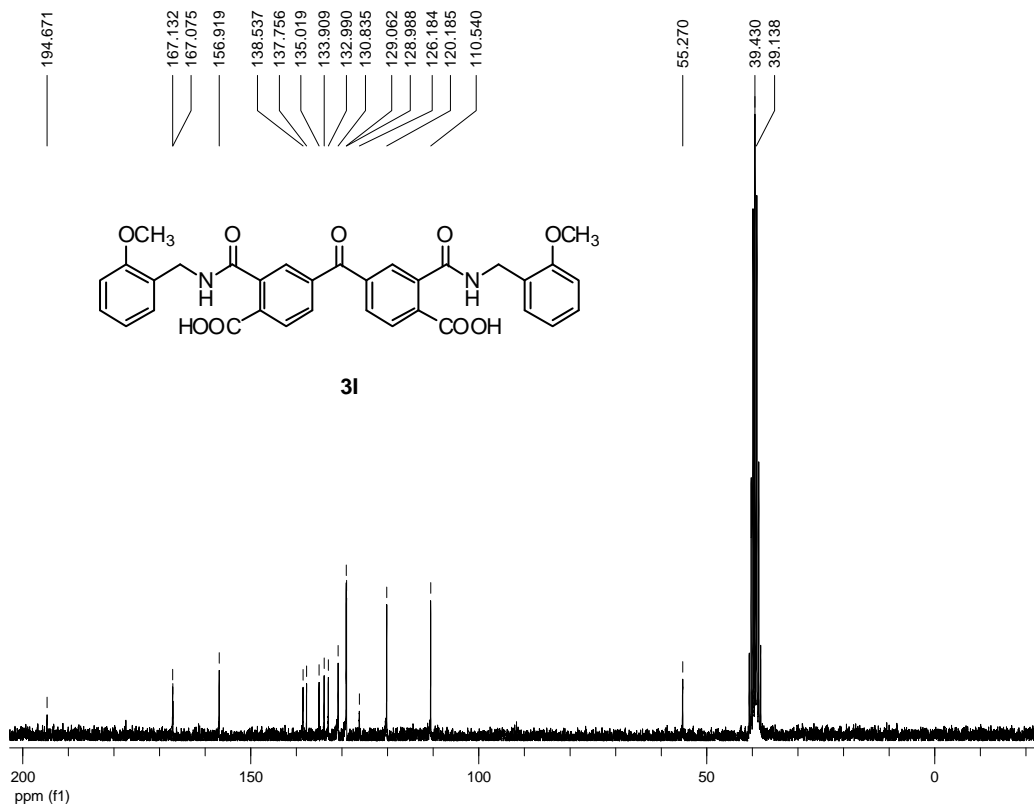

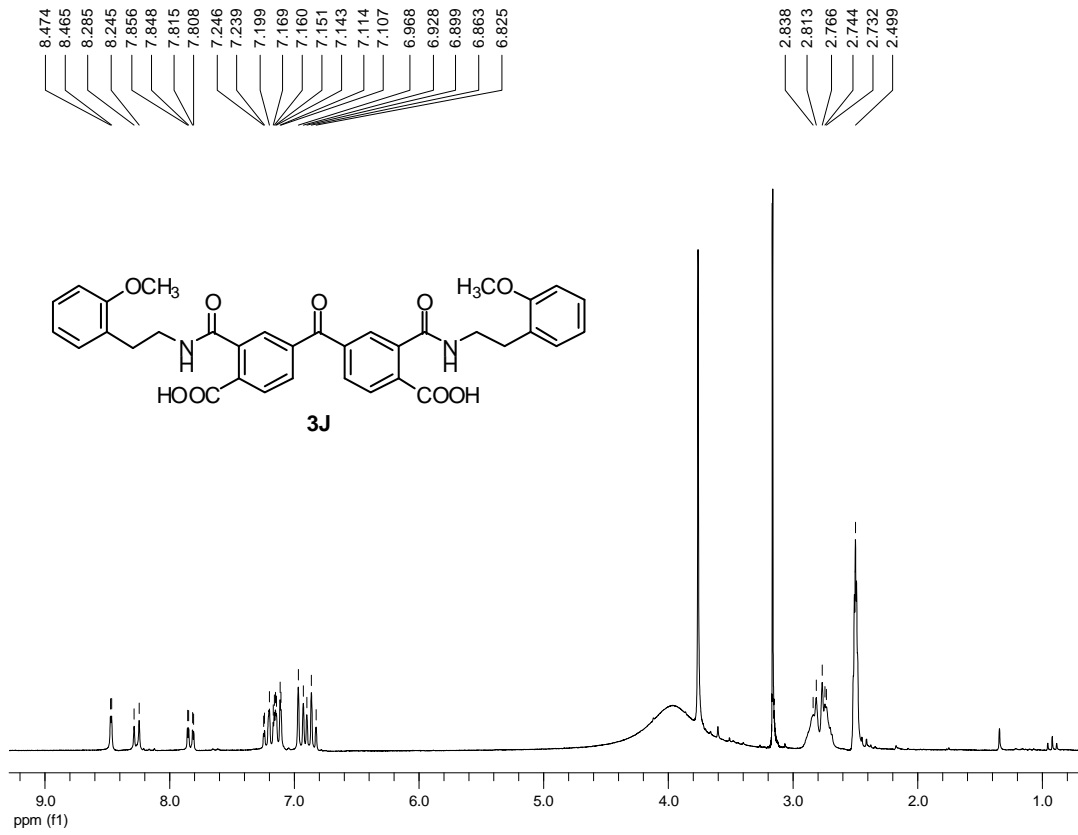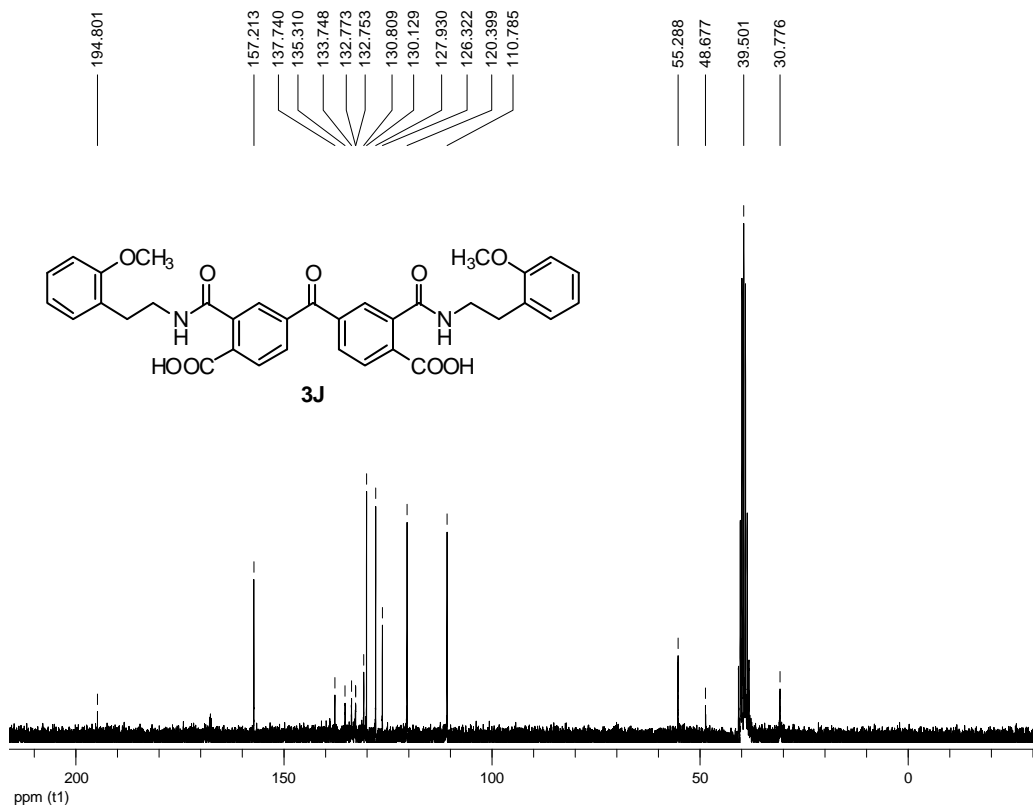

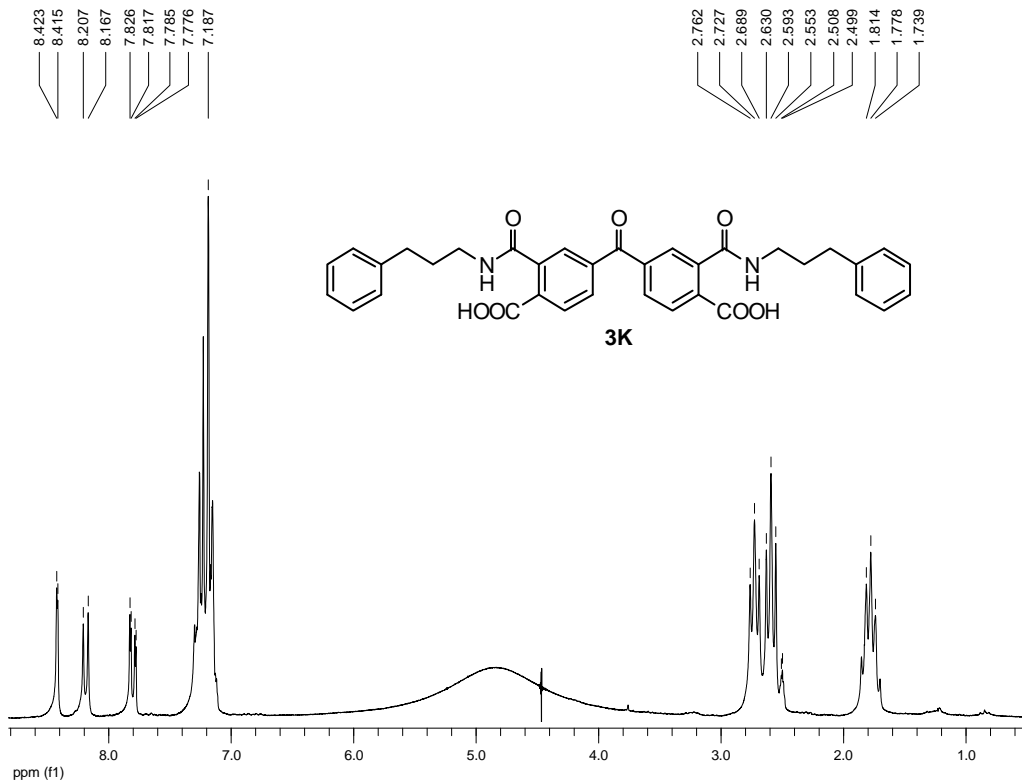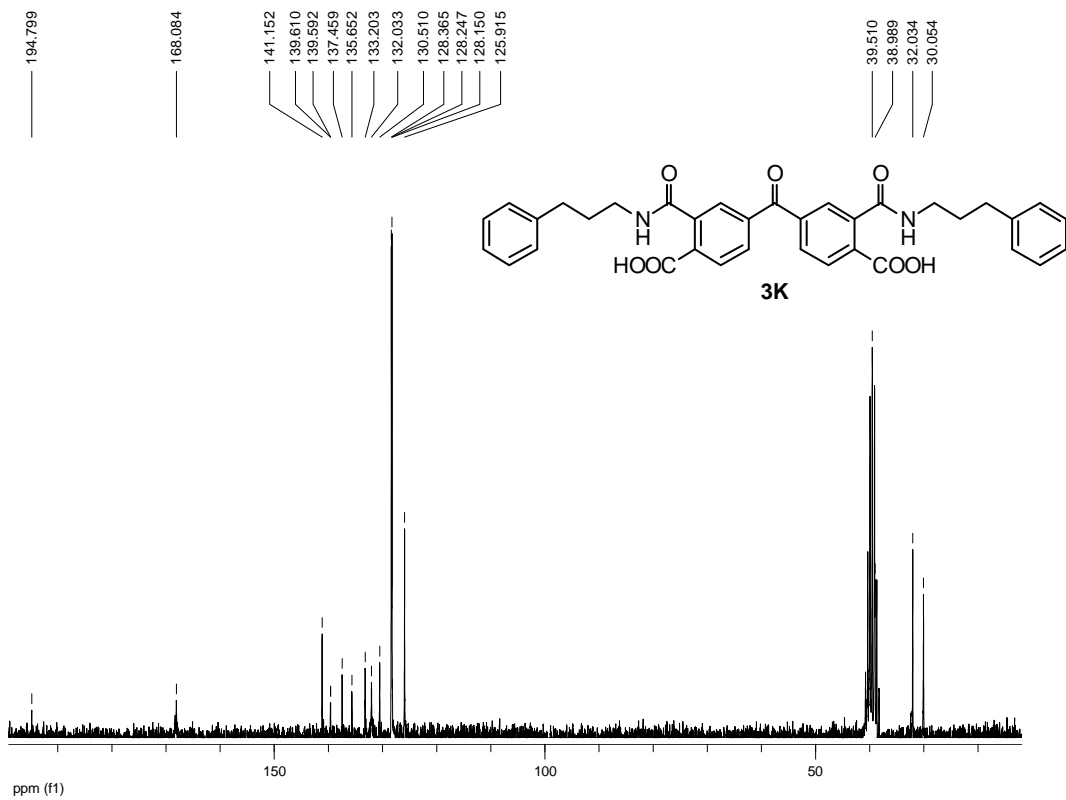



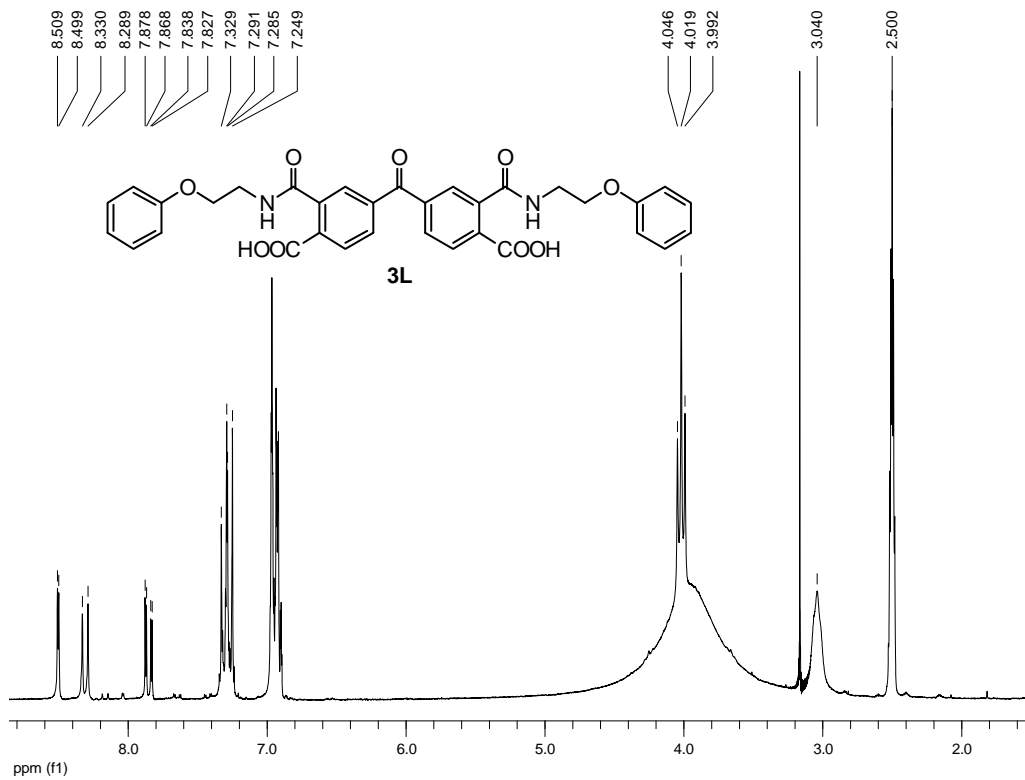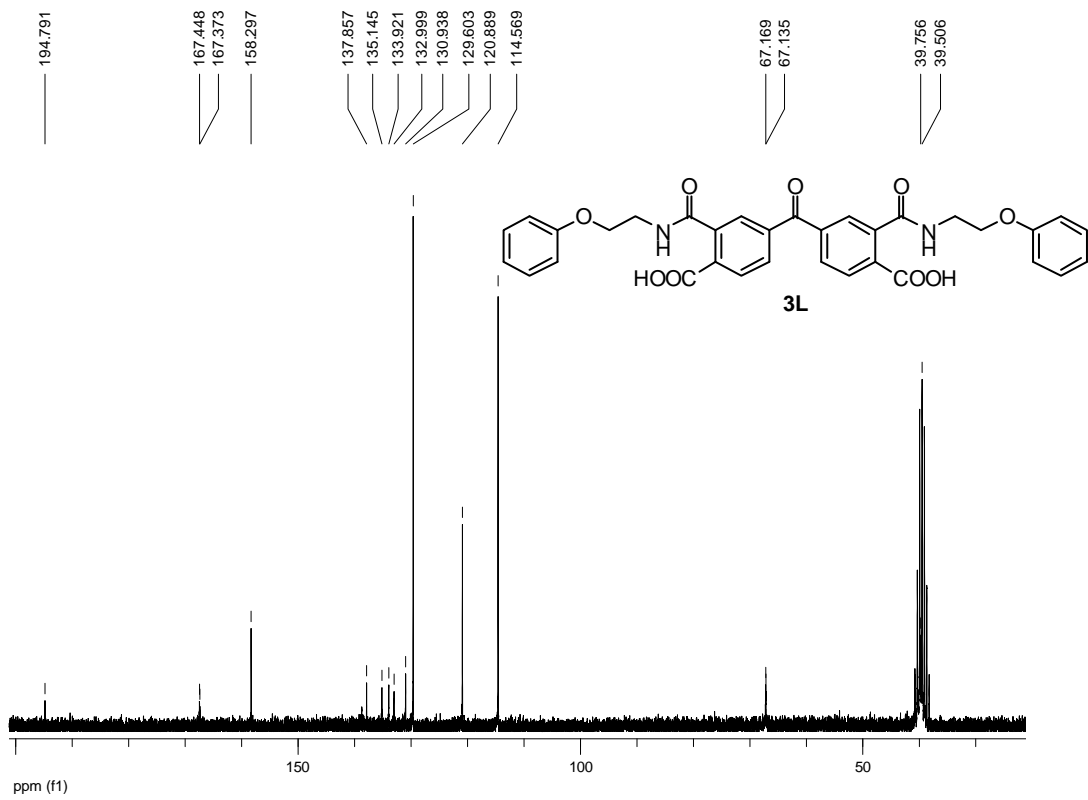

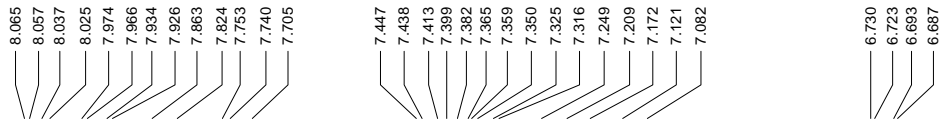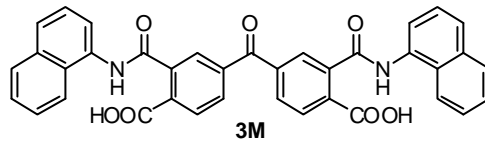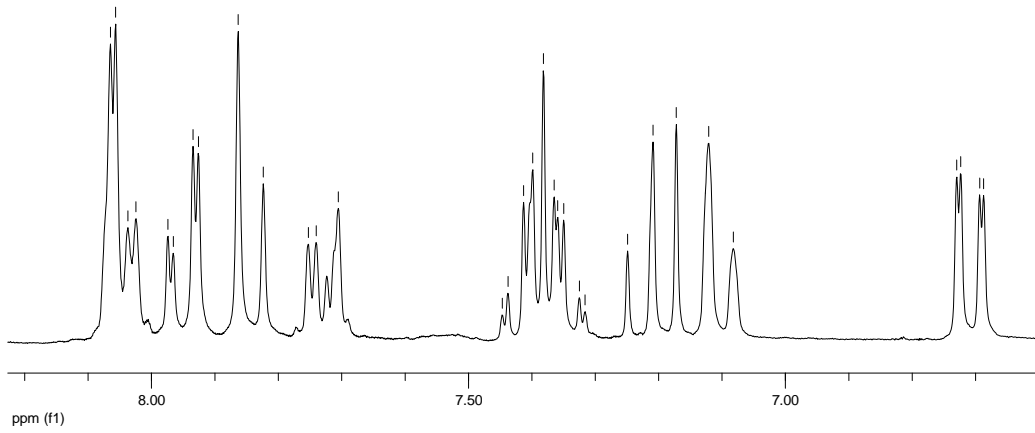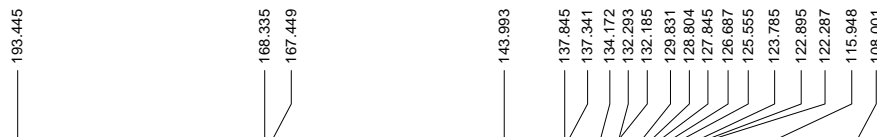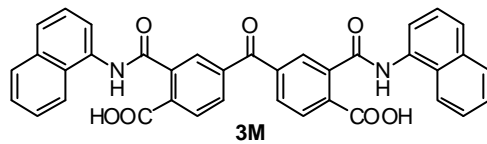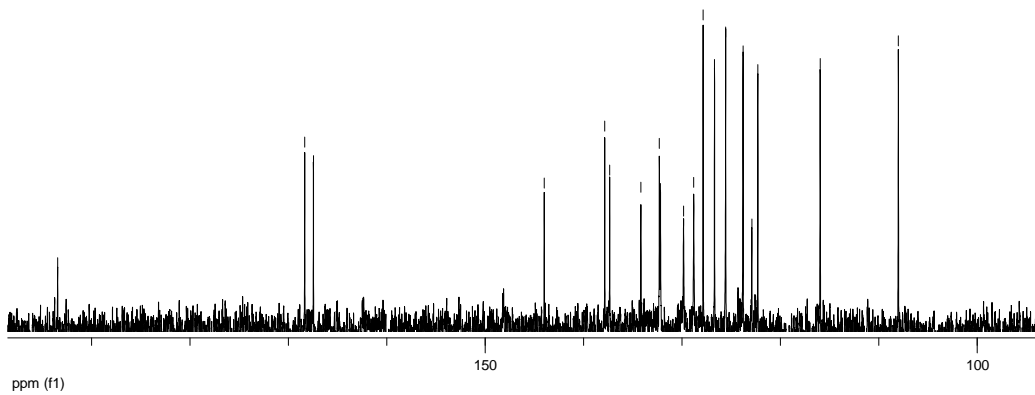

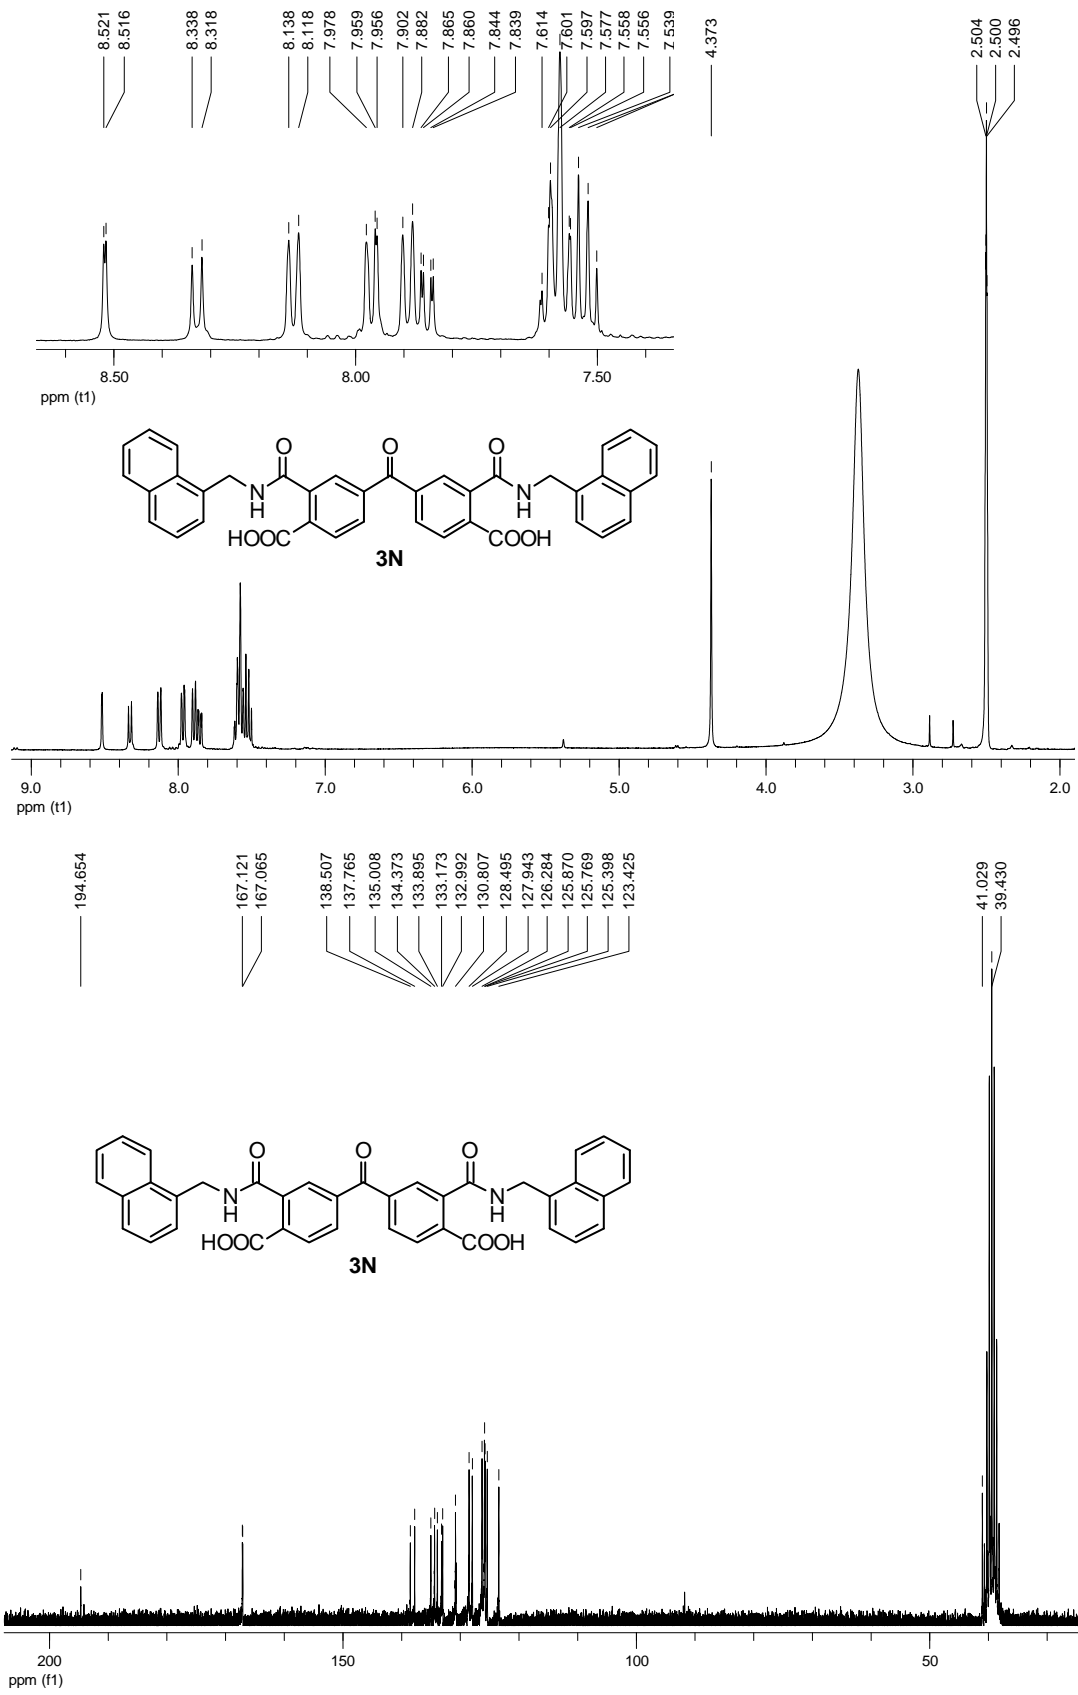

## II. Selected NMR spectra of compounds 6

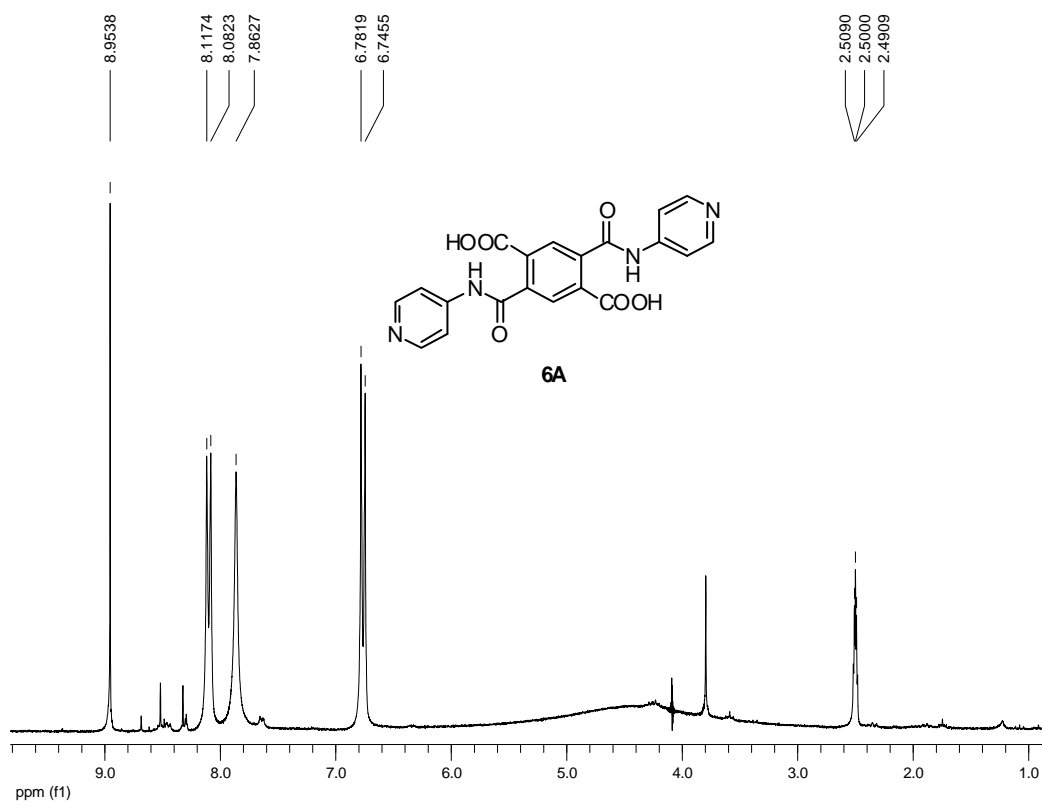

With two drops of D<sub>2</sub>O added

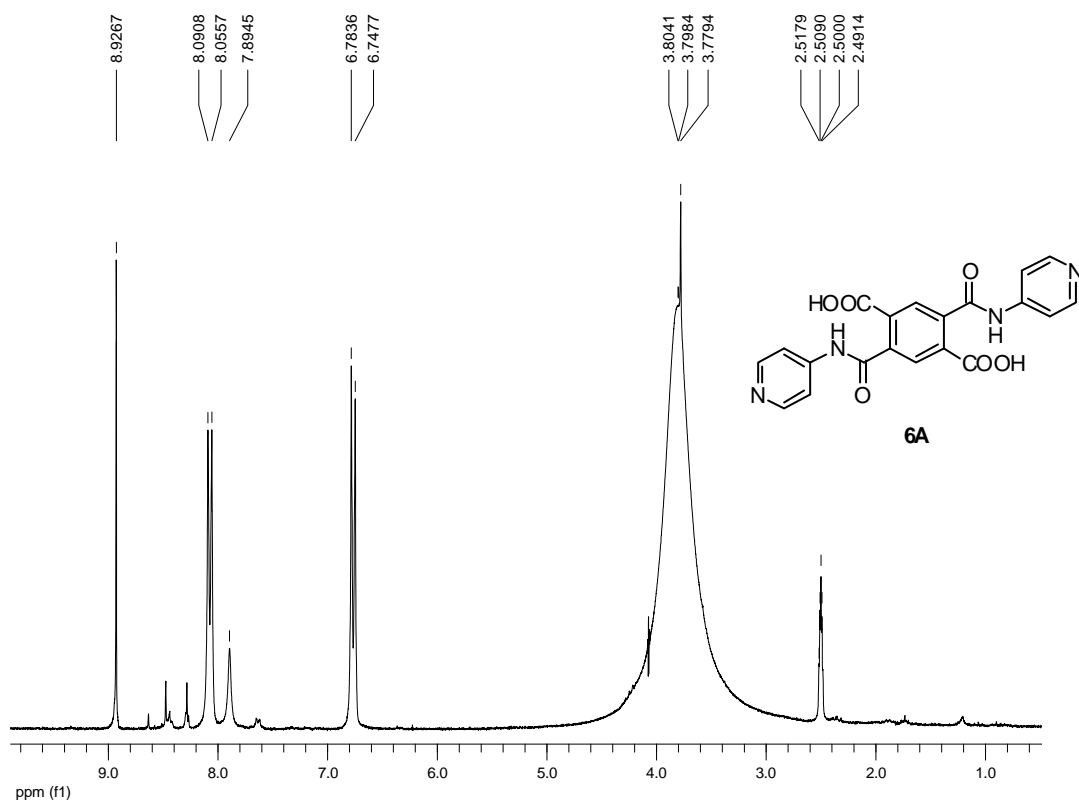

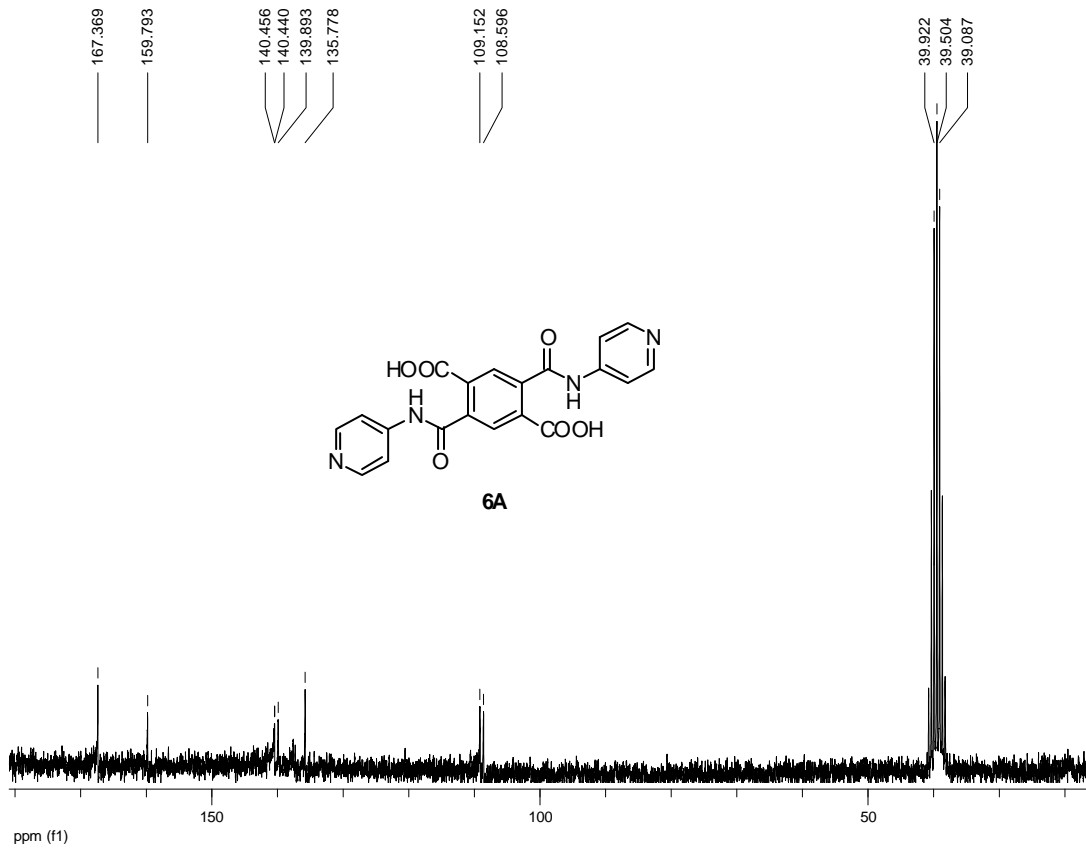

# Measured in D<sub>2</sub>O/DCI

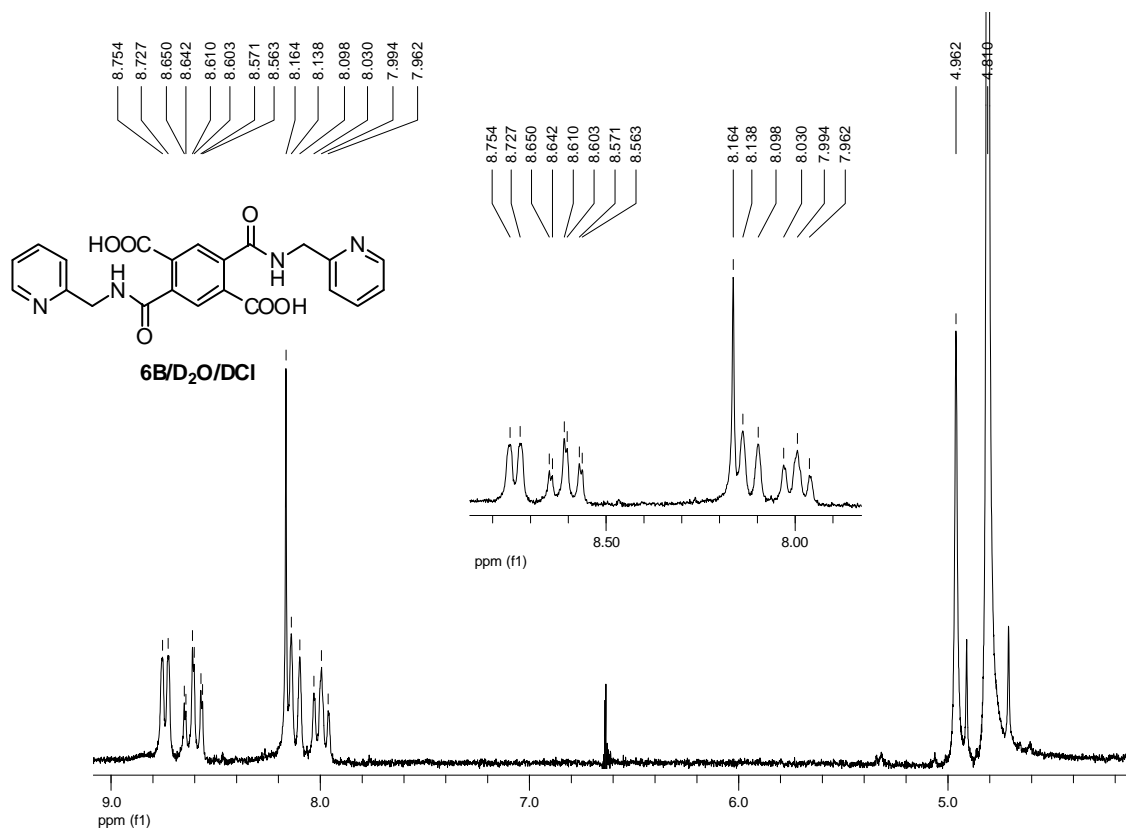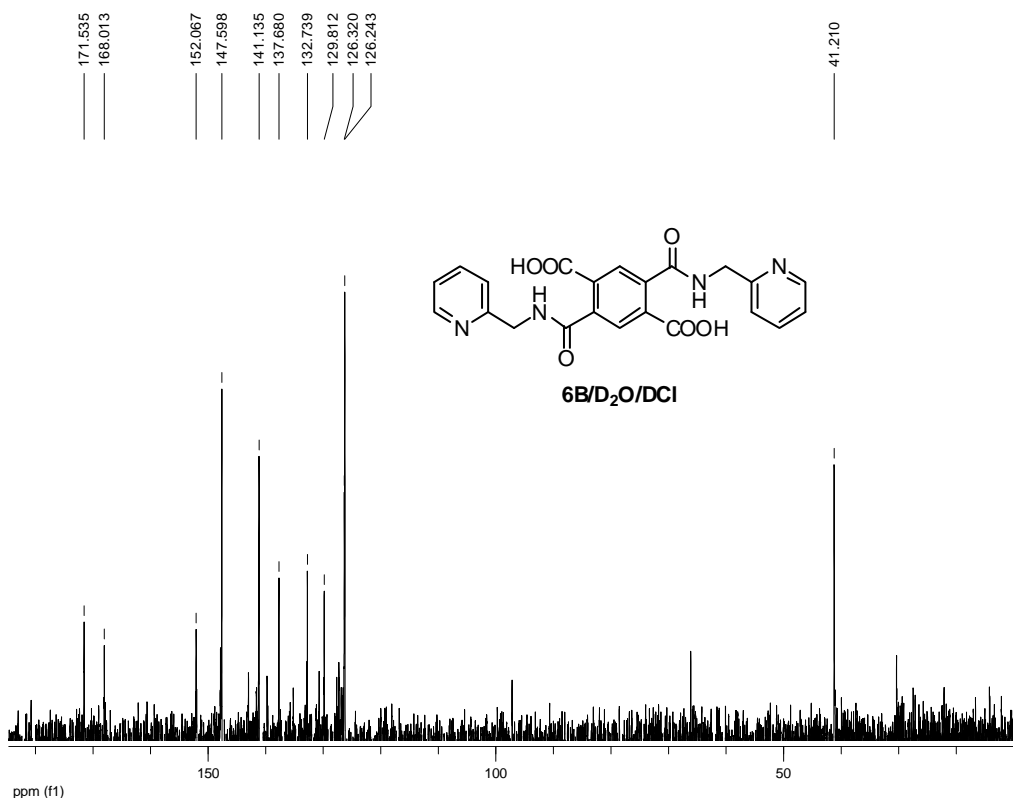

Measured in D<sub>2</sub>O/DCI

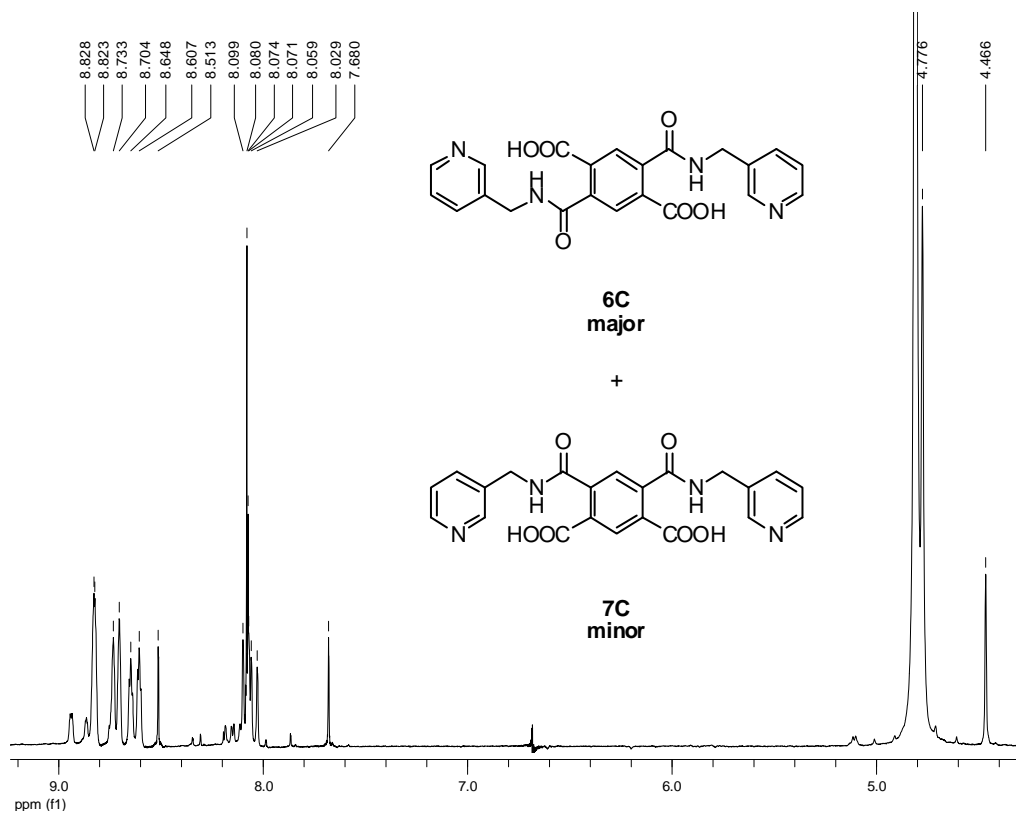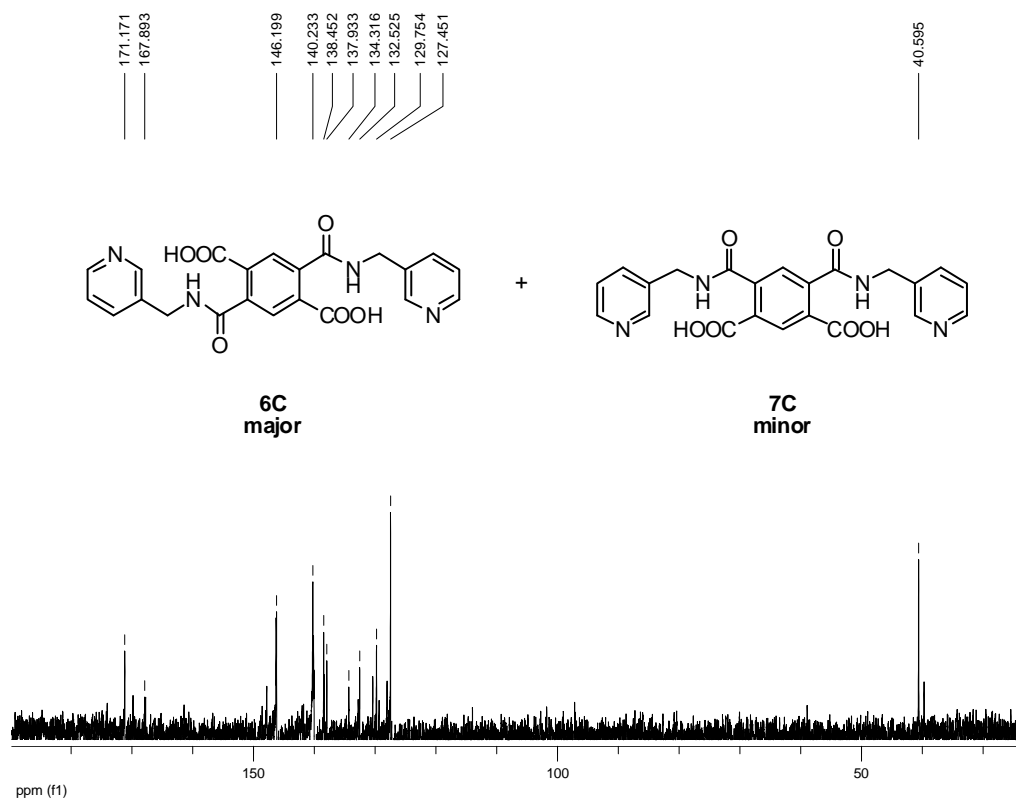

Measured in D<sub>2</sub>O/DCl

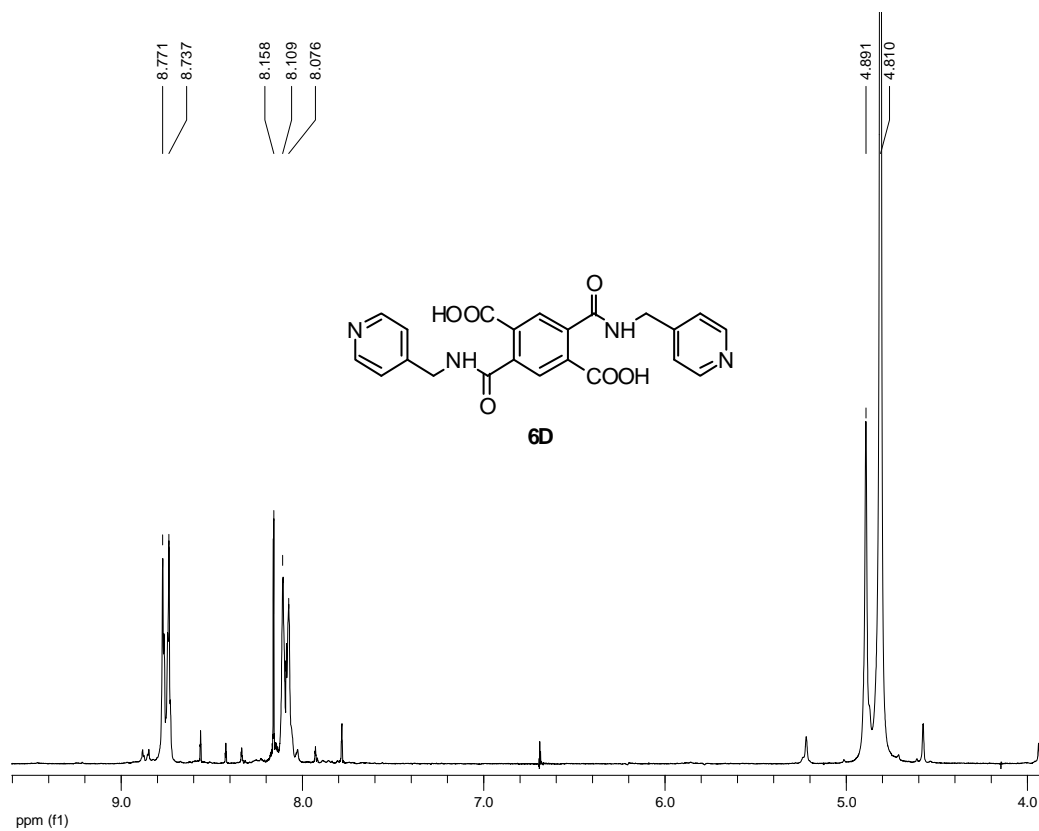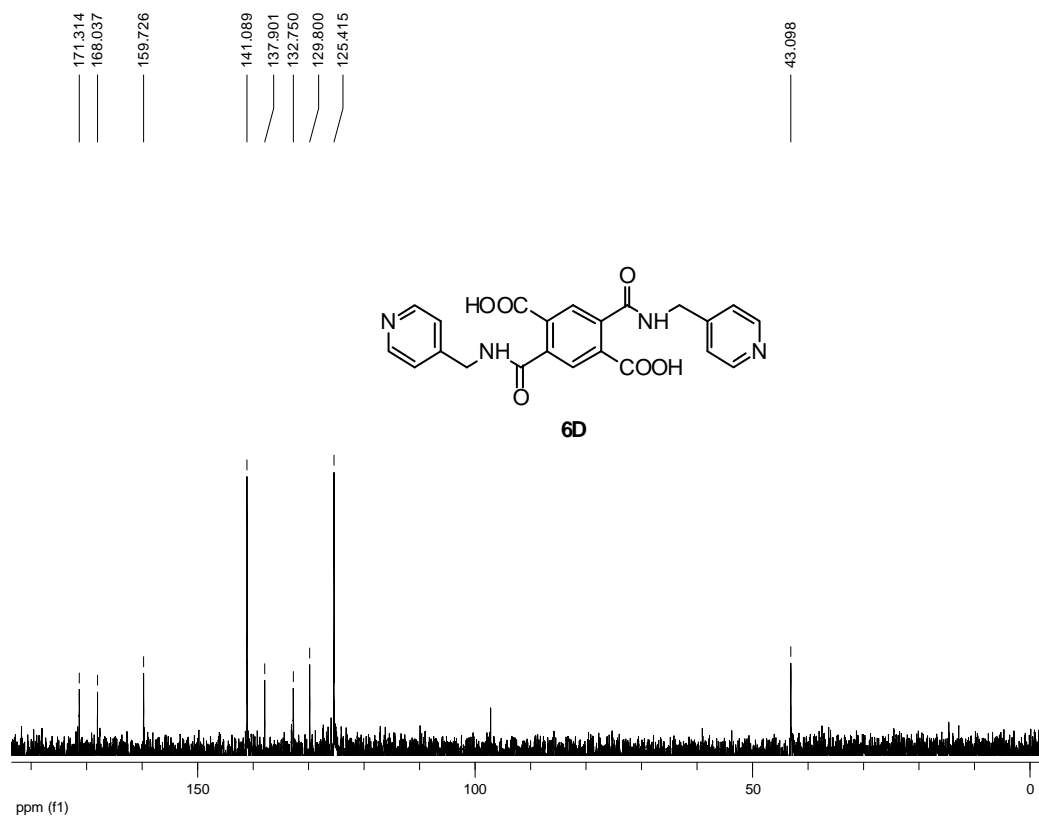



# Reaction in THF

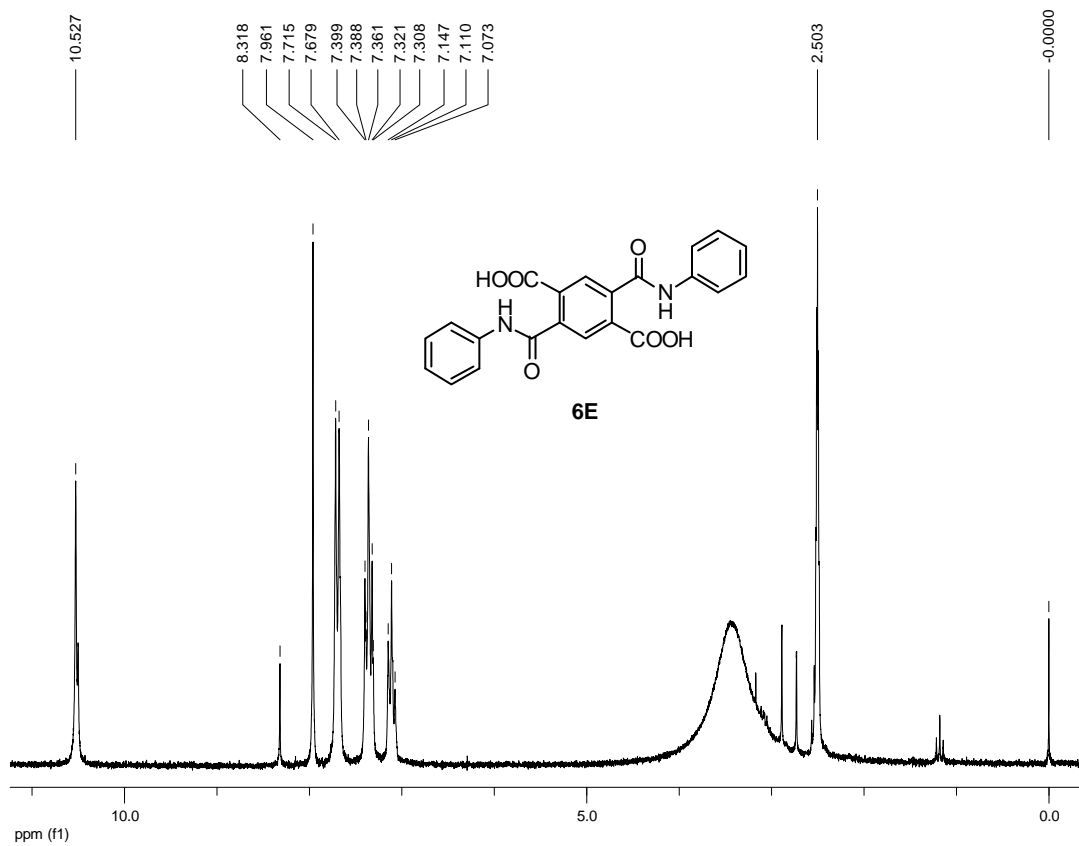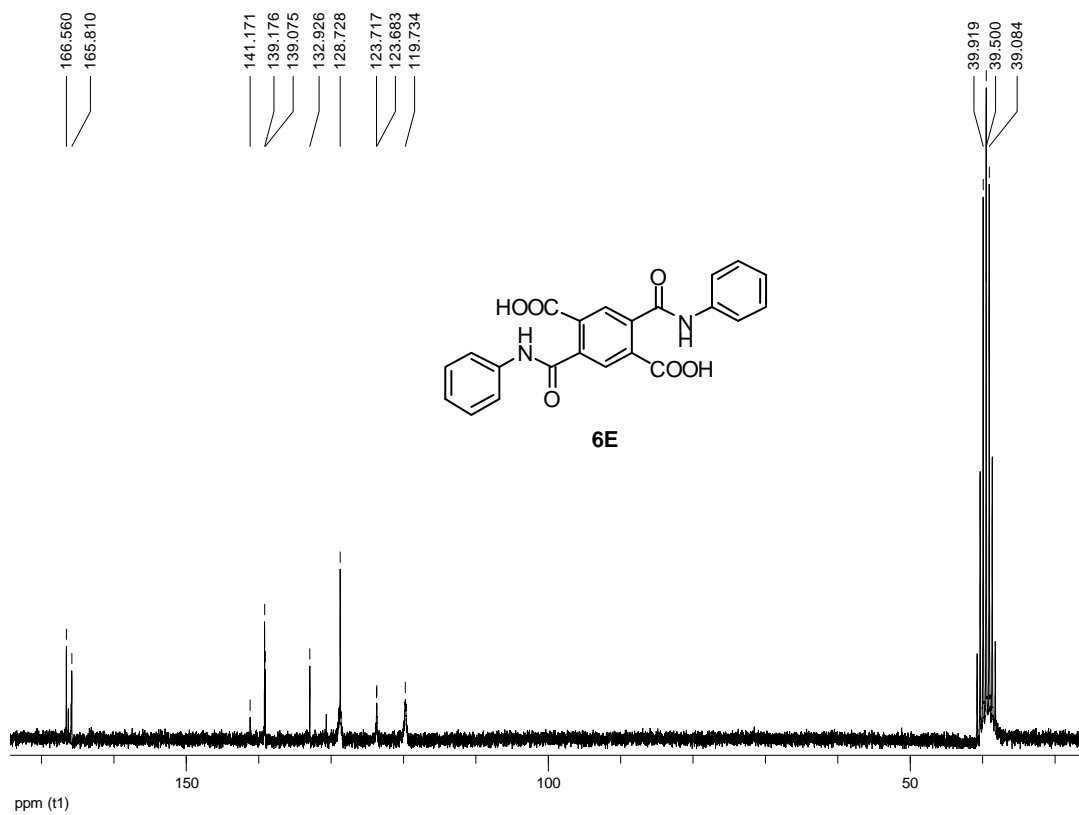

# Reaction in Ethanol

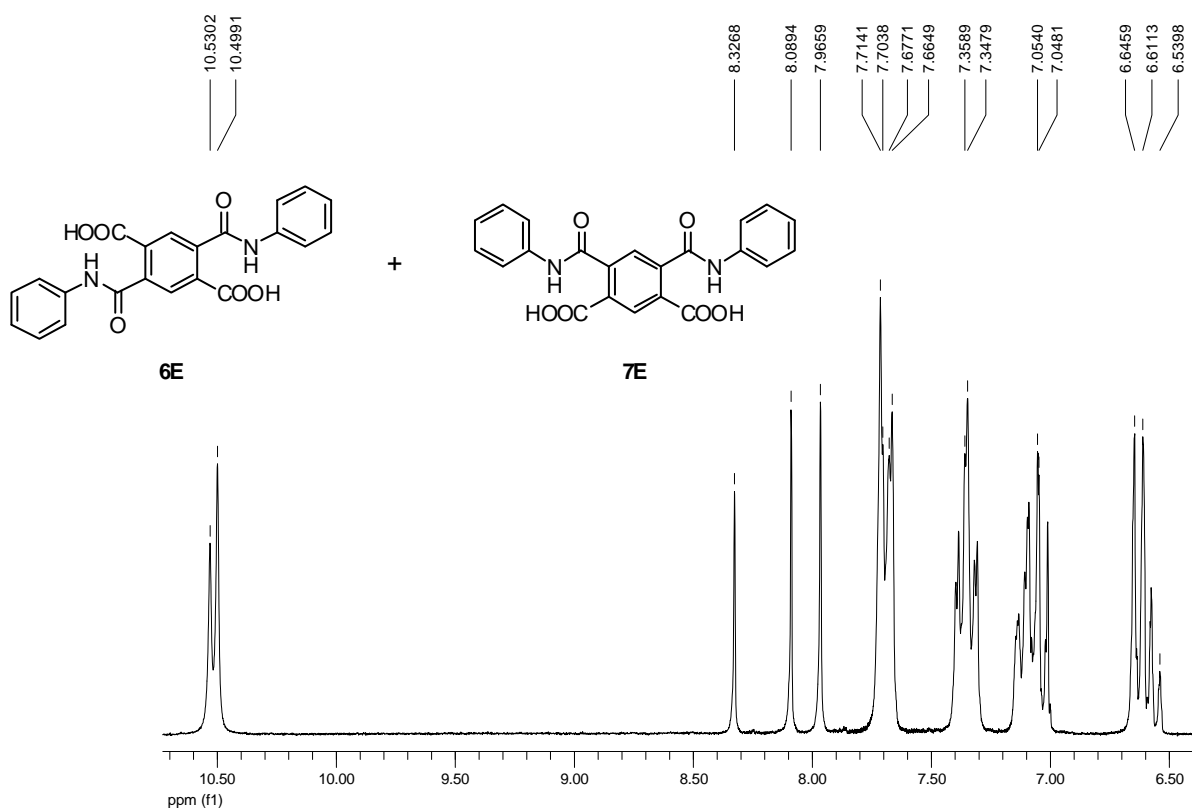

## Reaction in THF

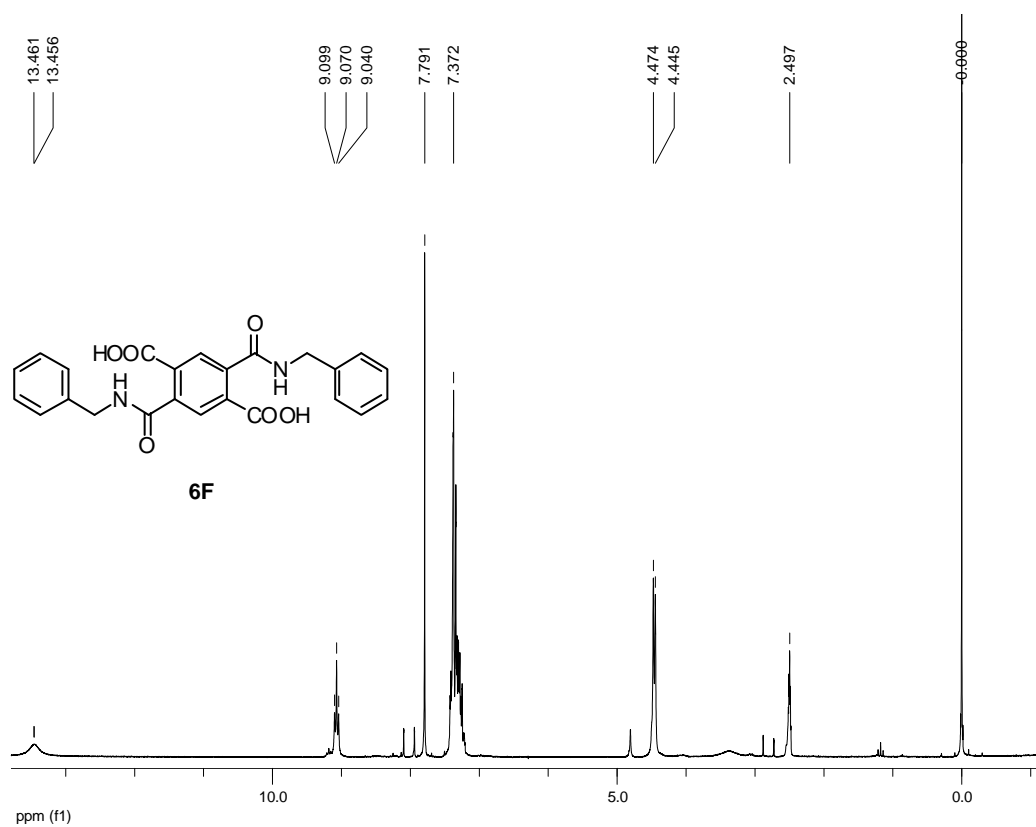

## Reaction in Ethanol

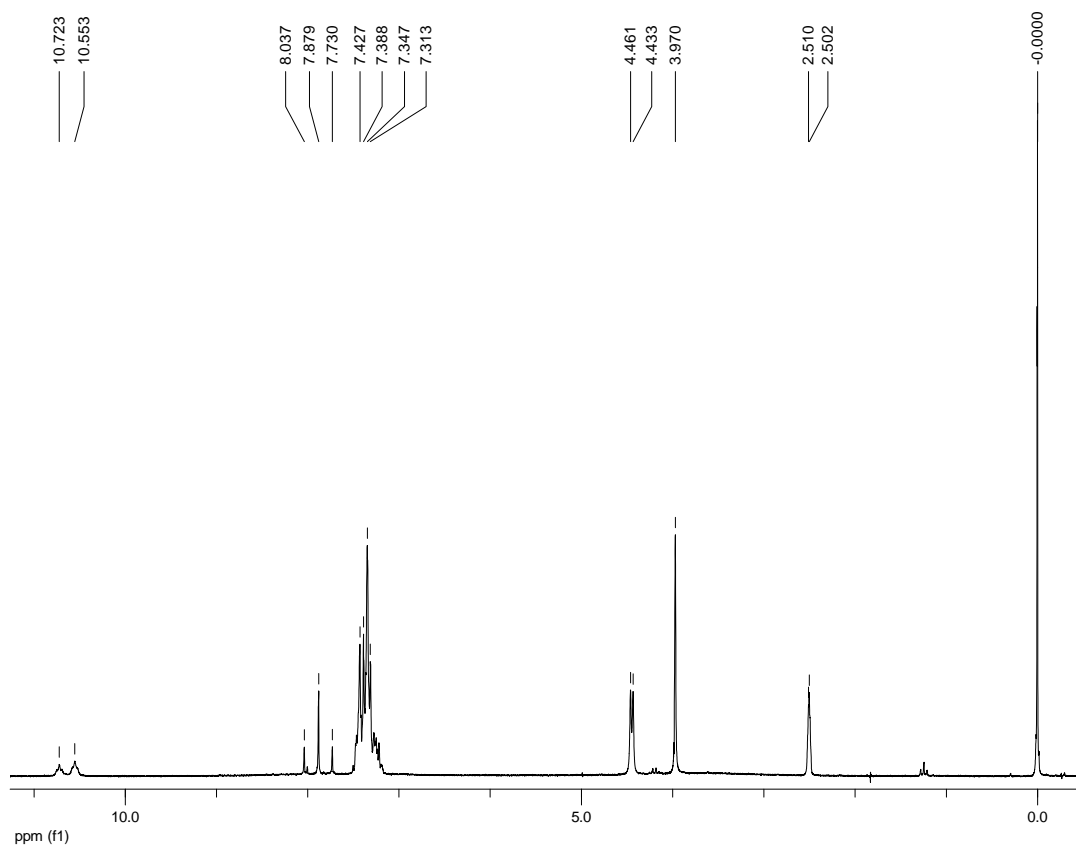

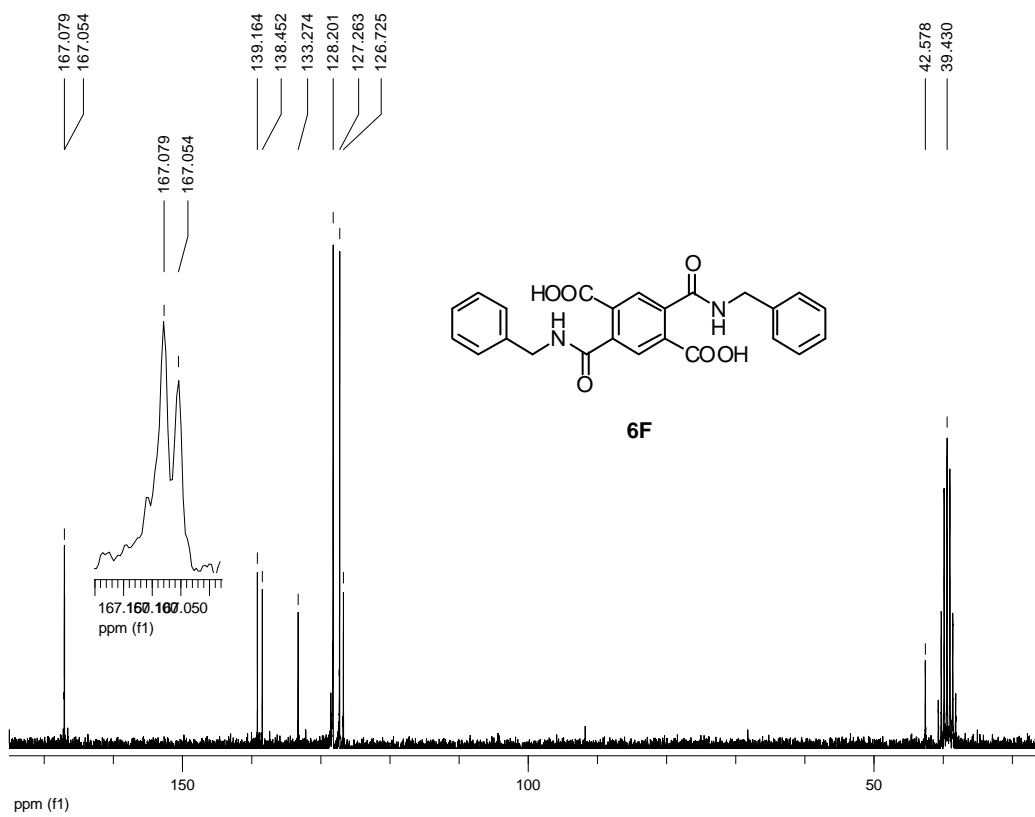

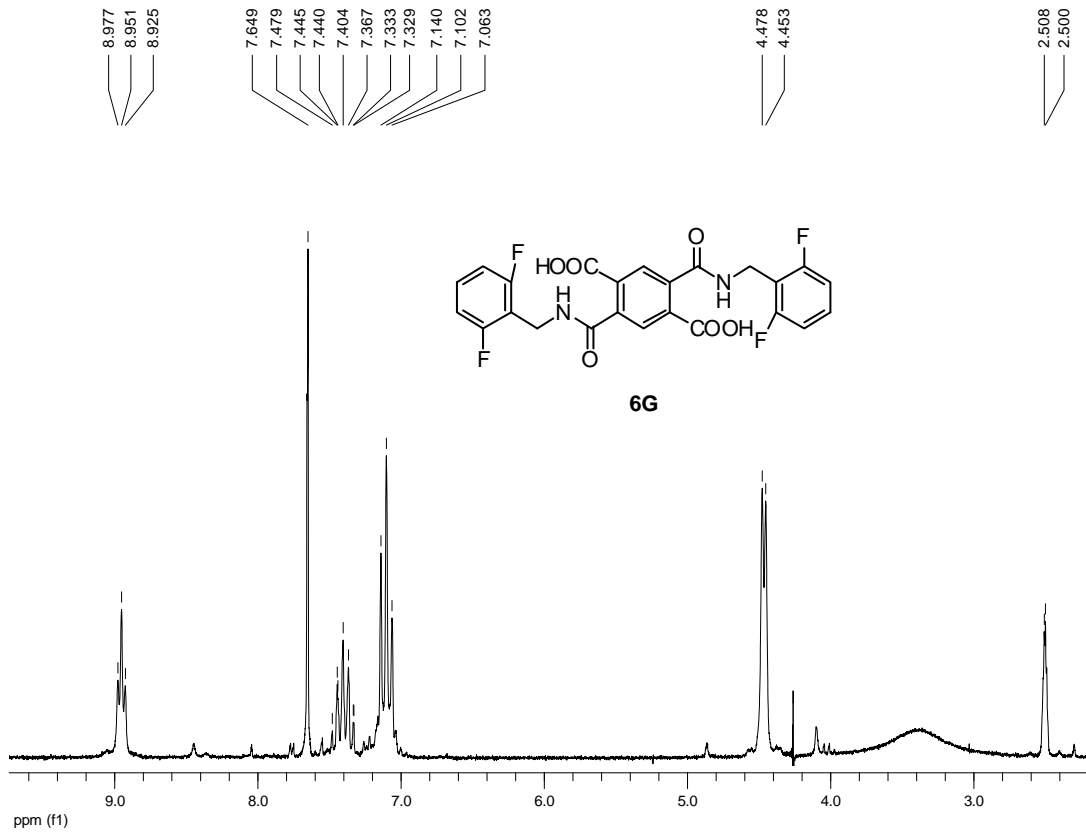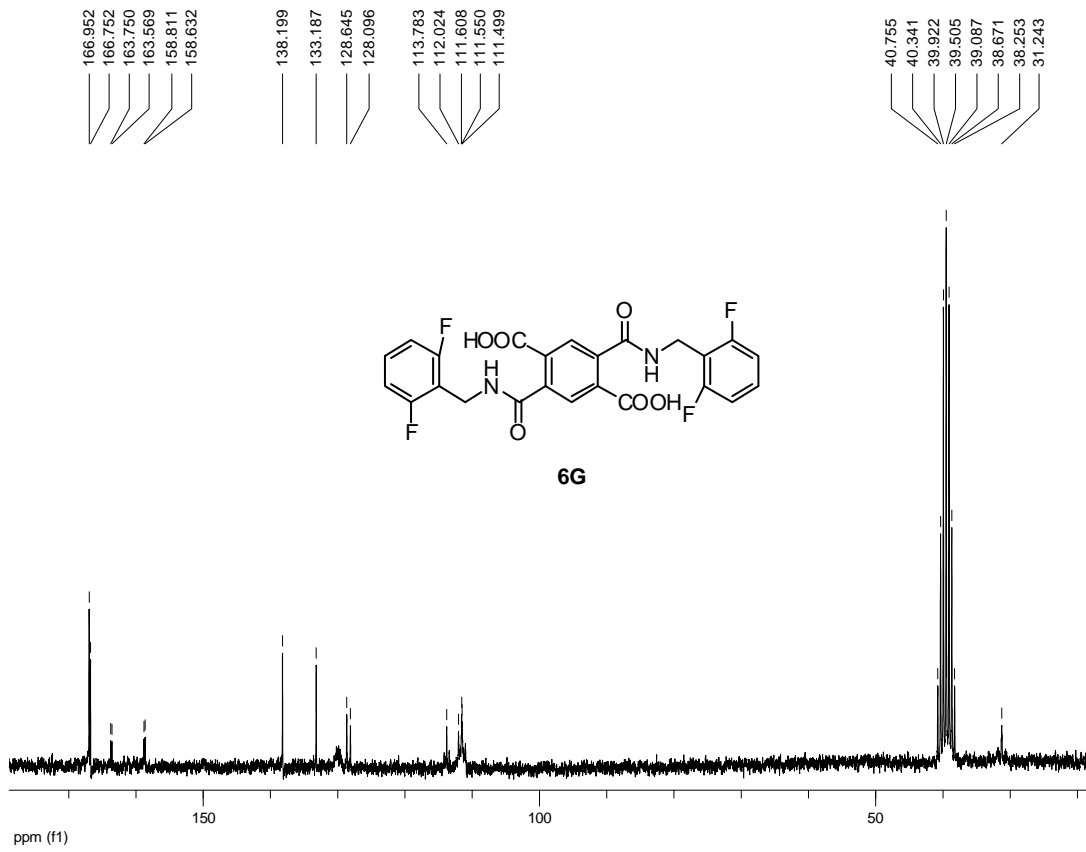

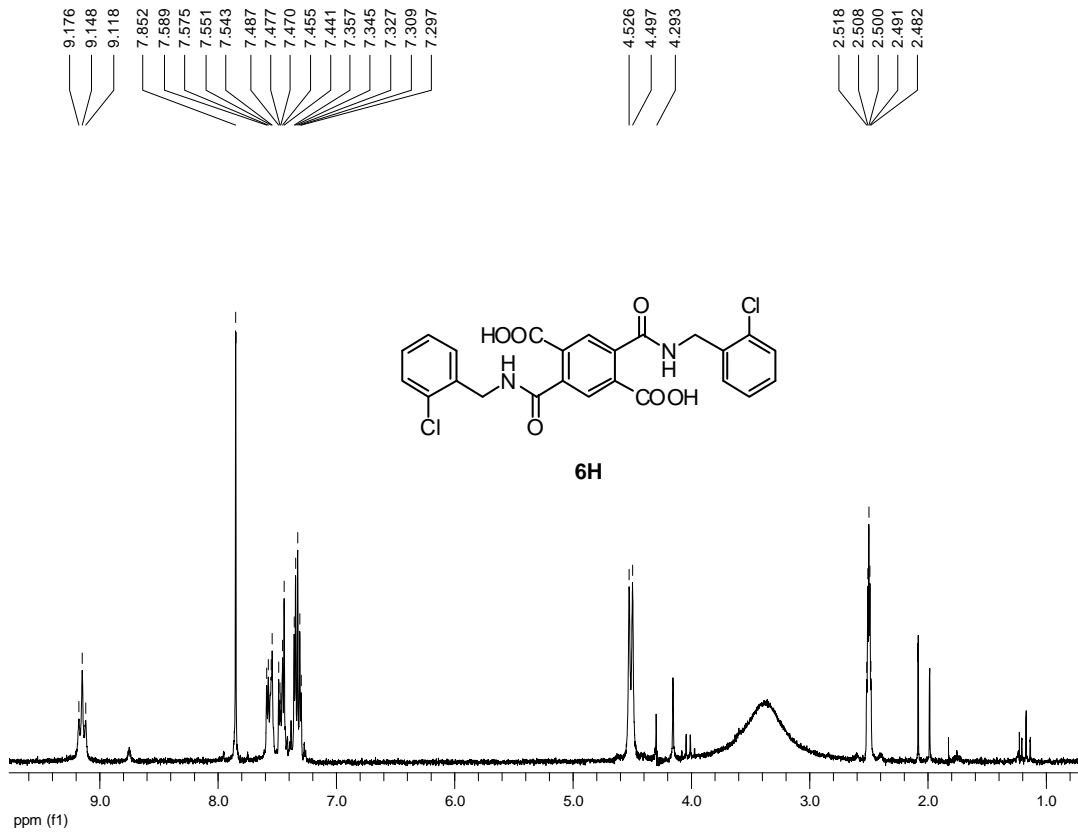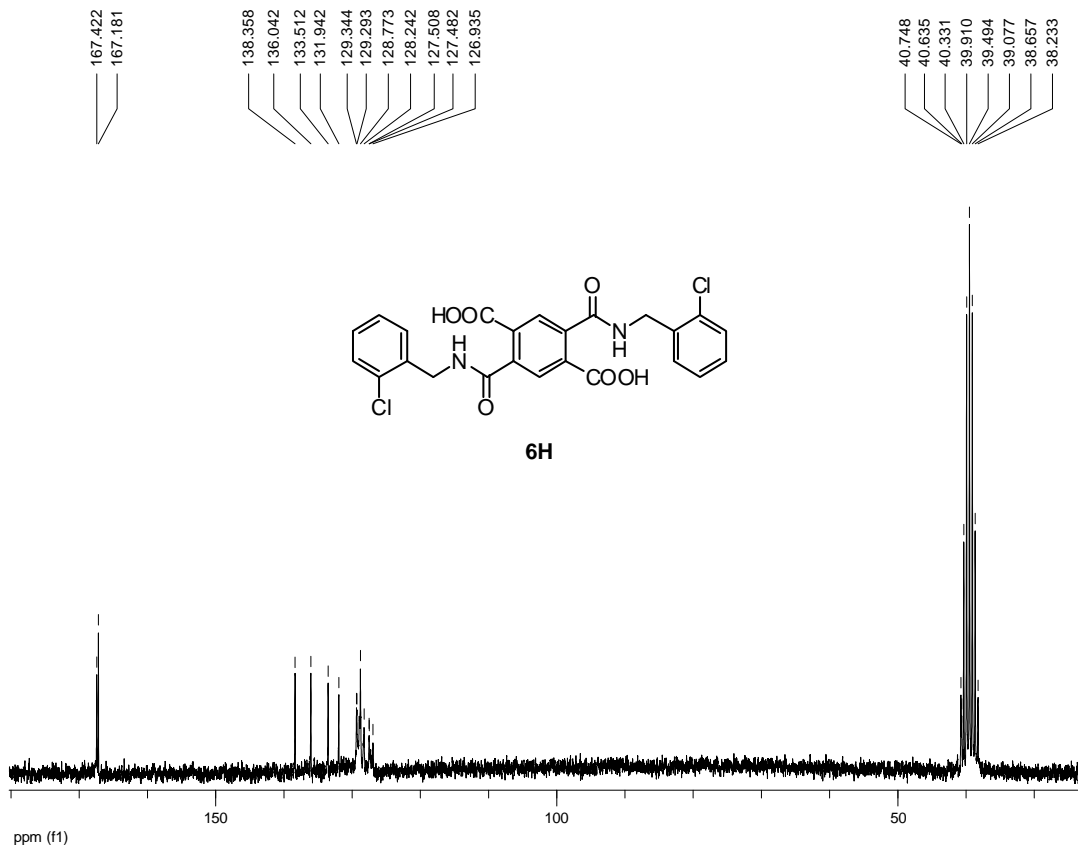

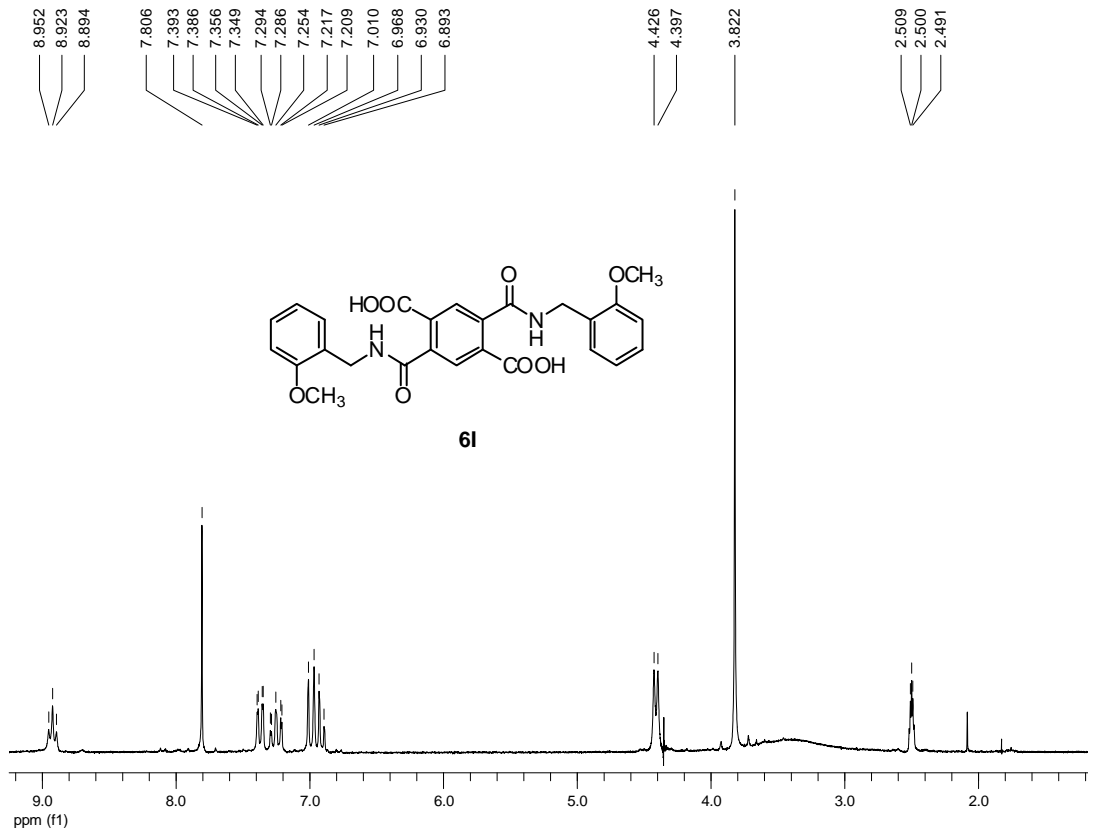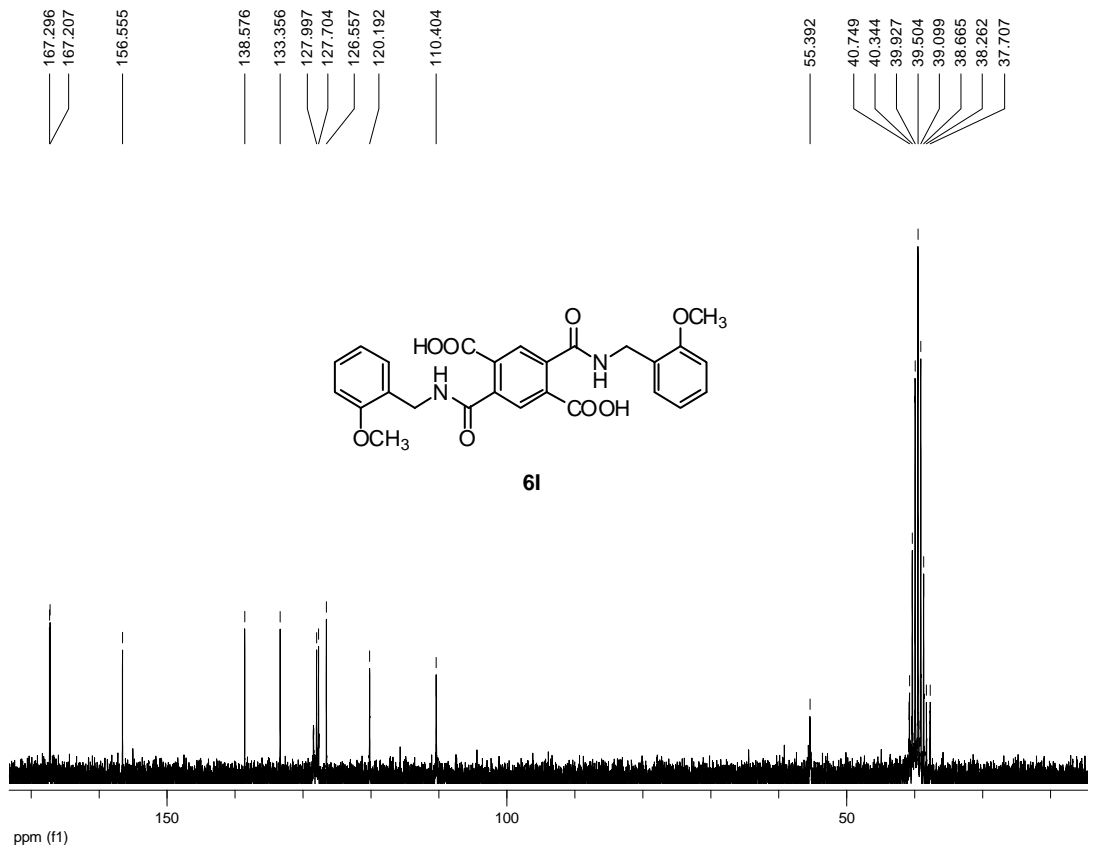

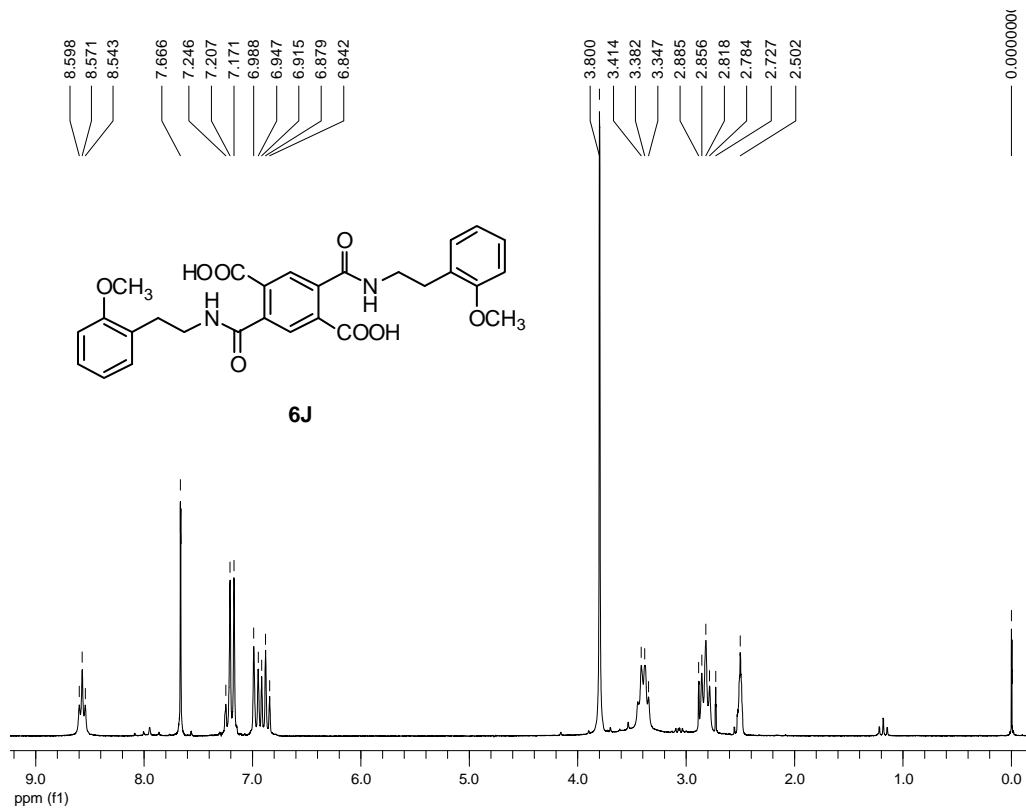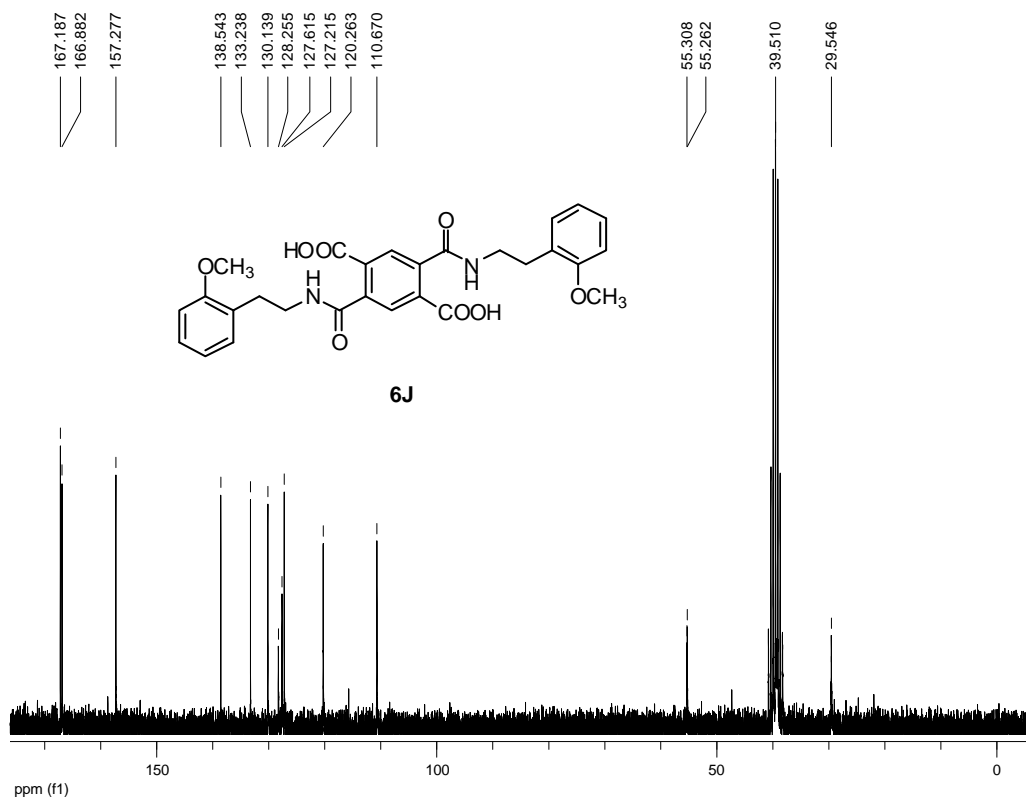



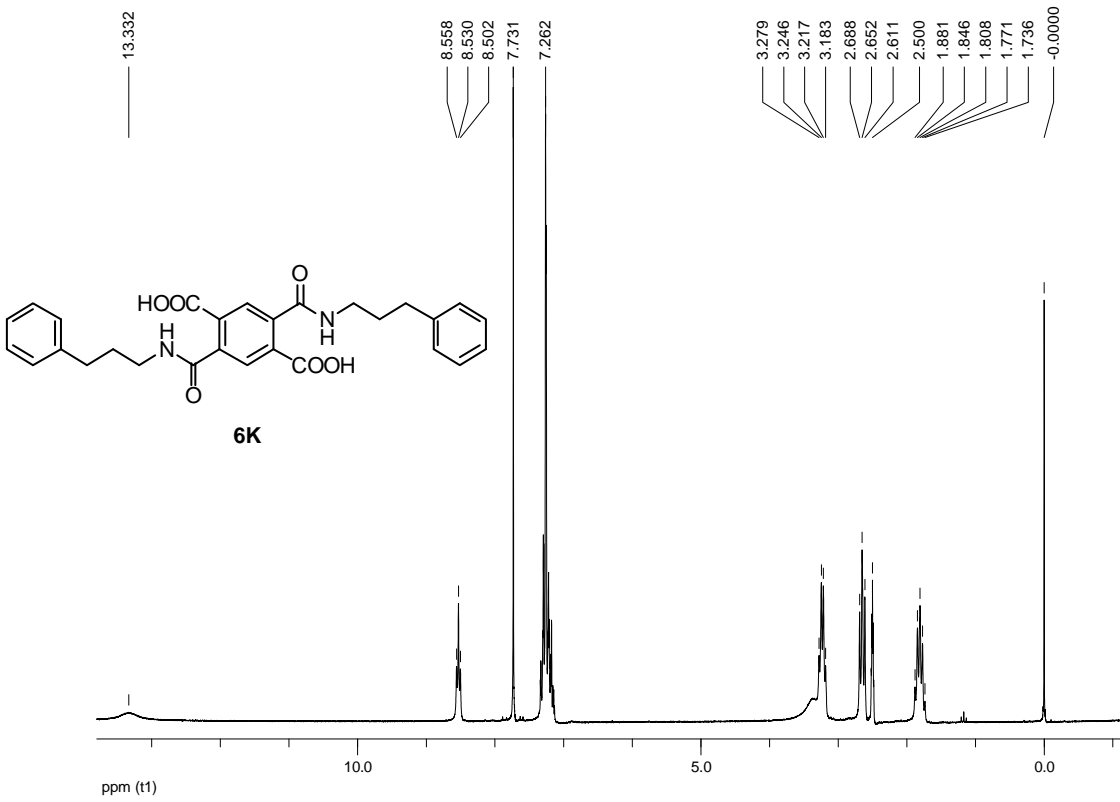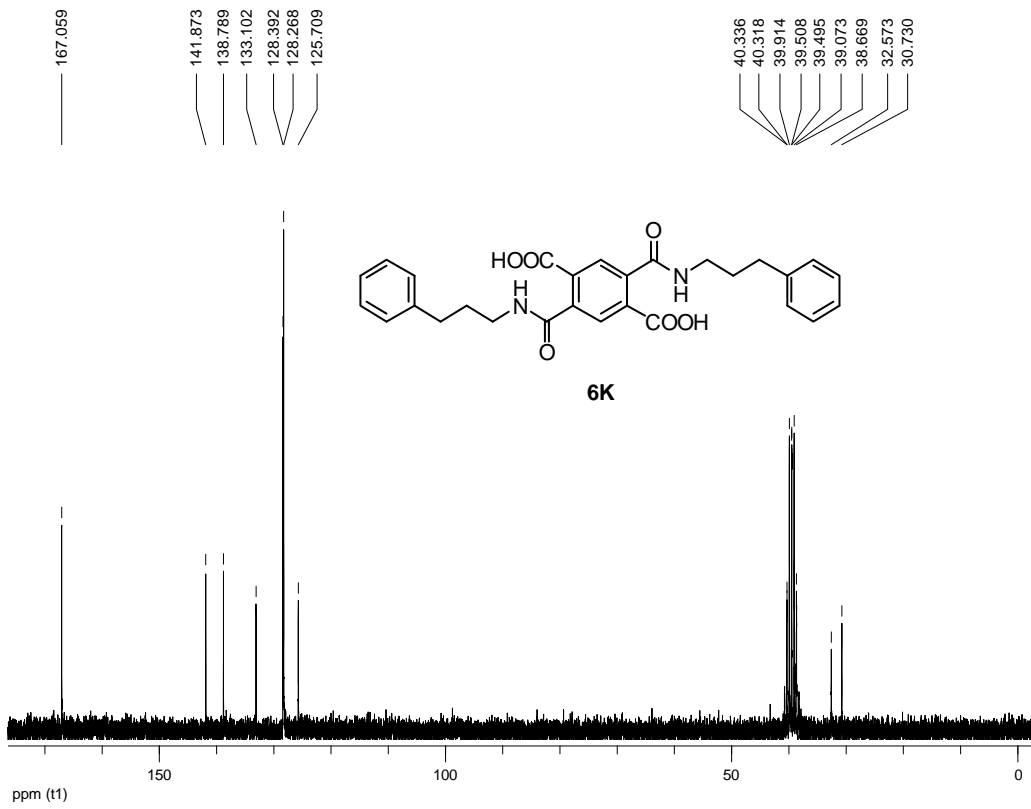

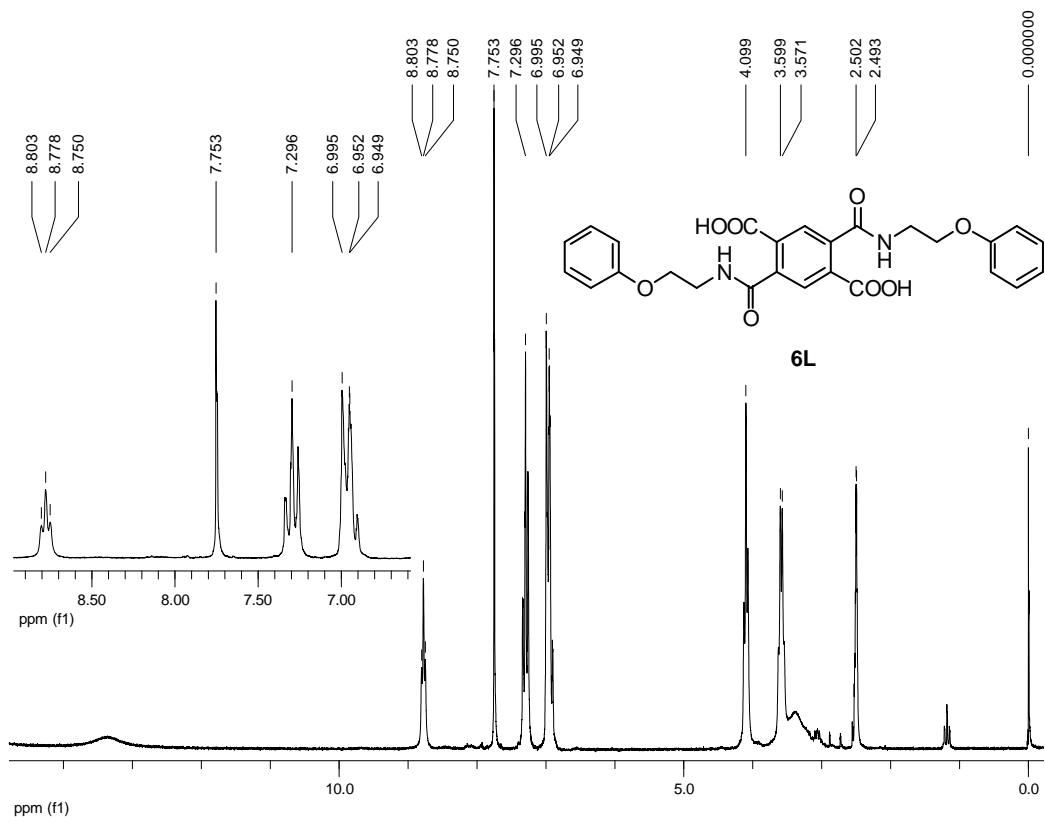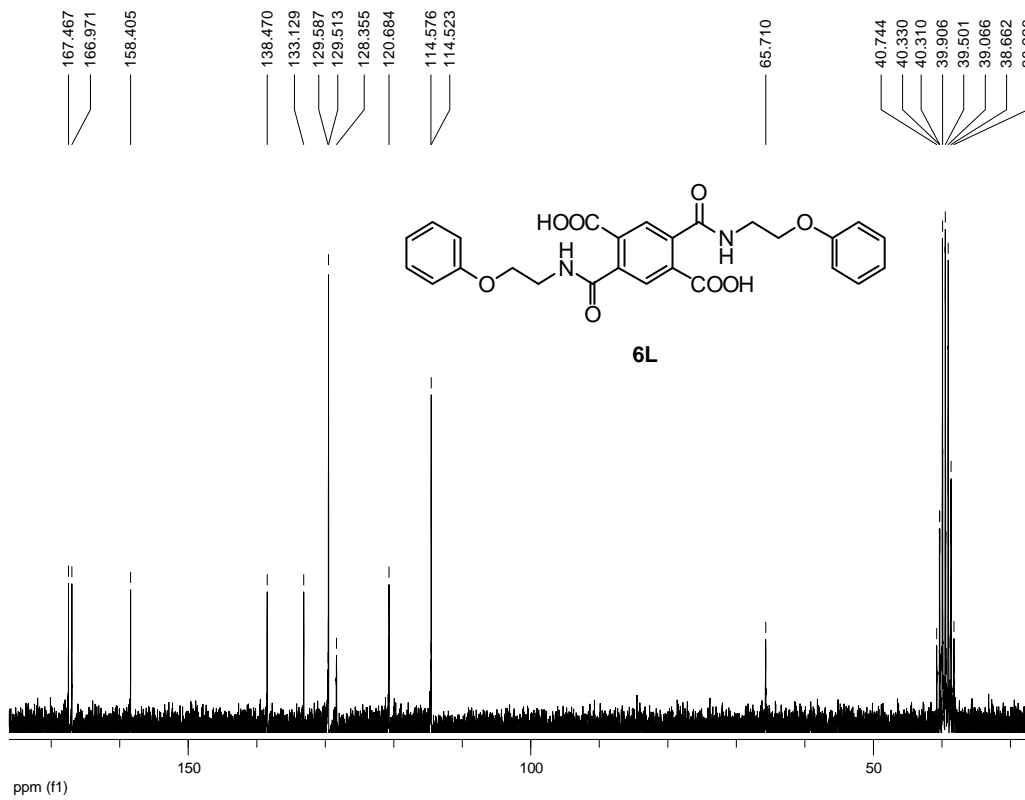

# Reaction in Toluene

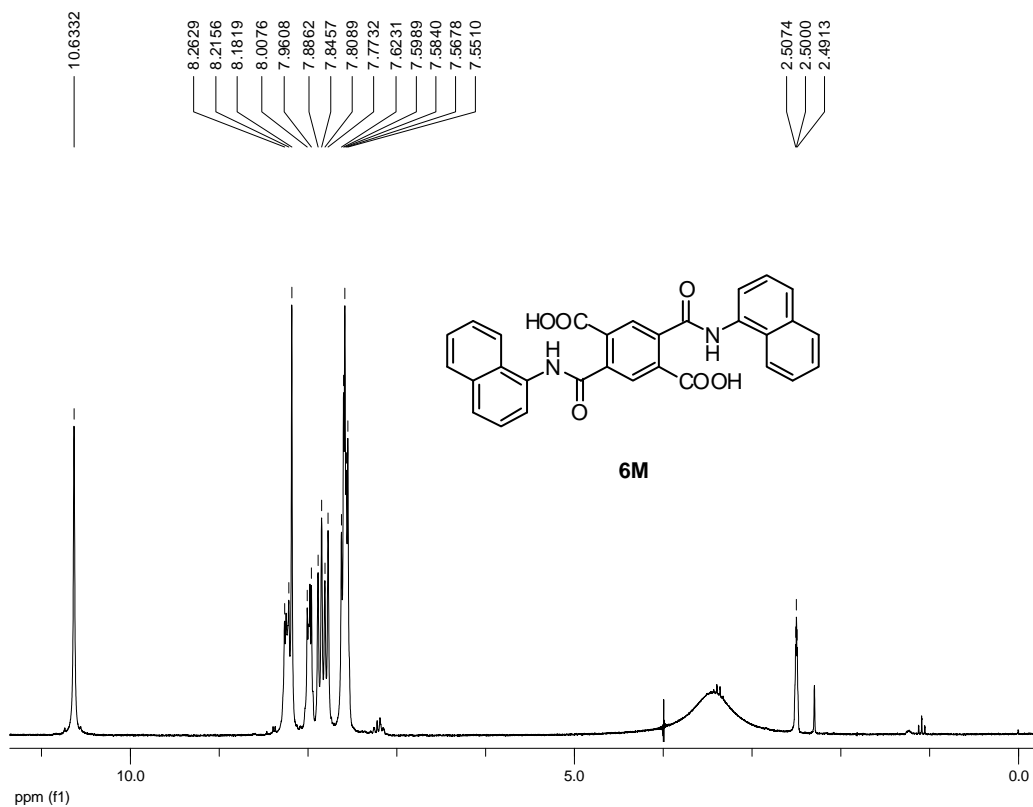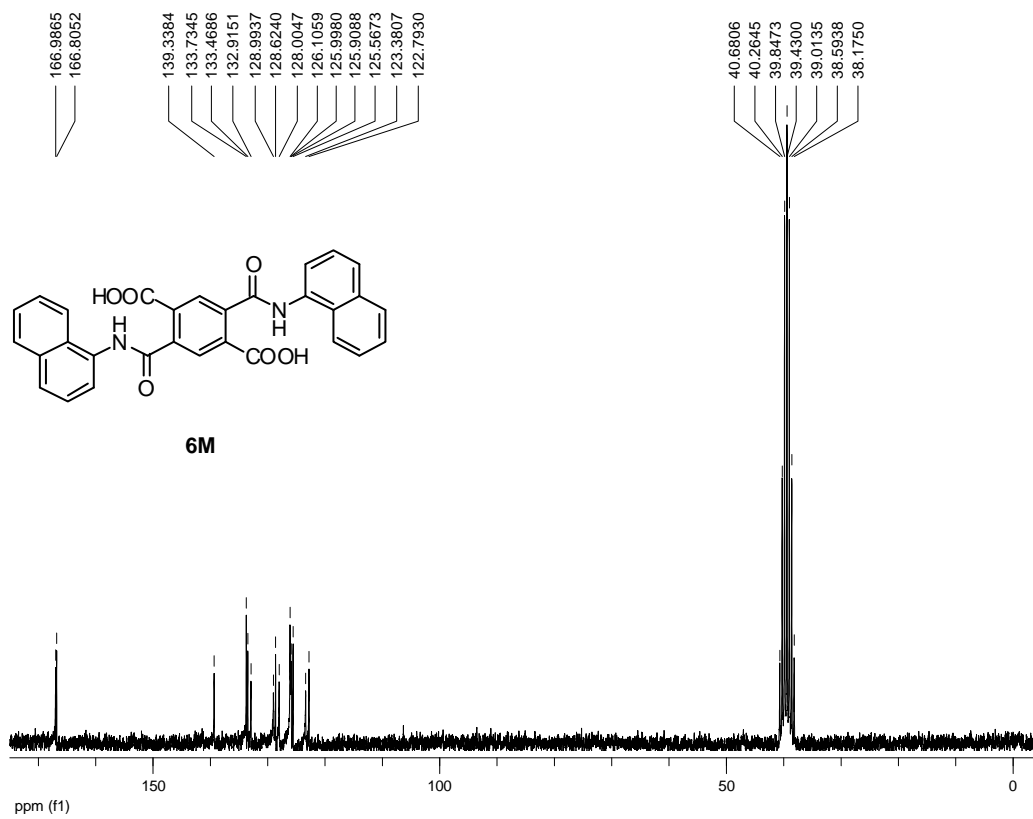

# Reaction in Ethanol

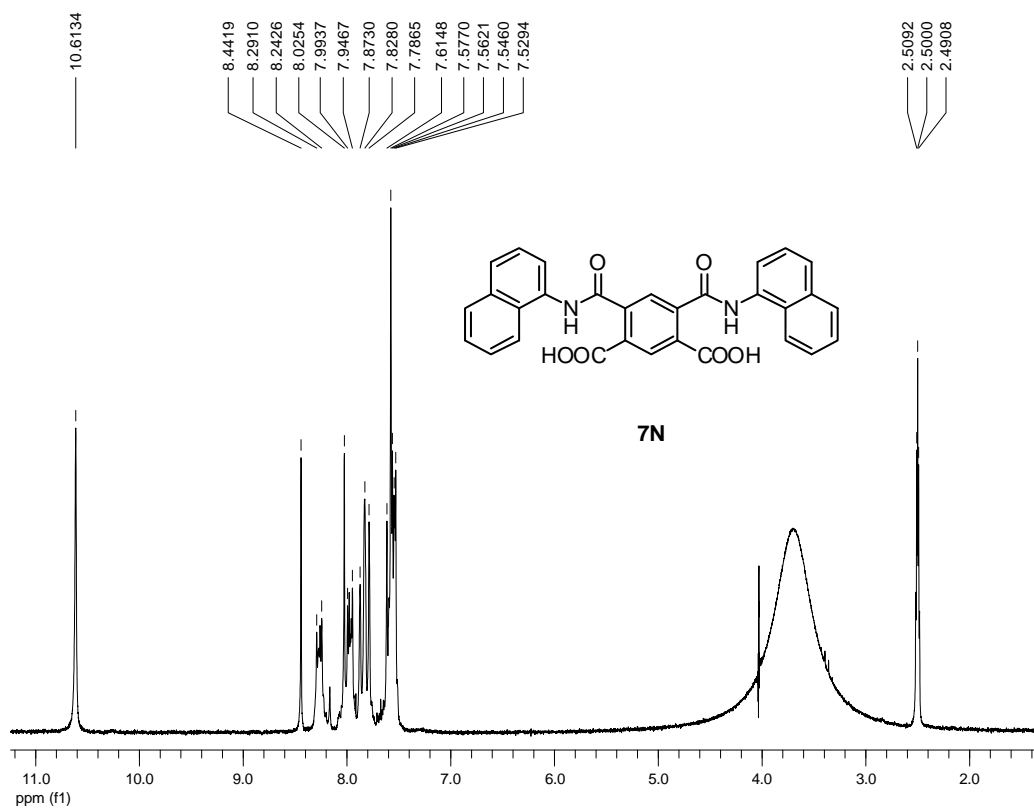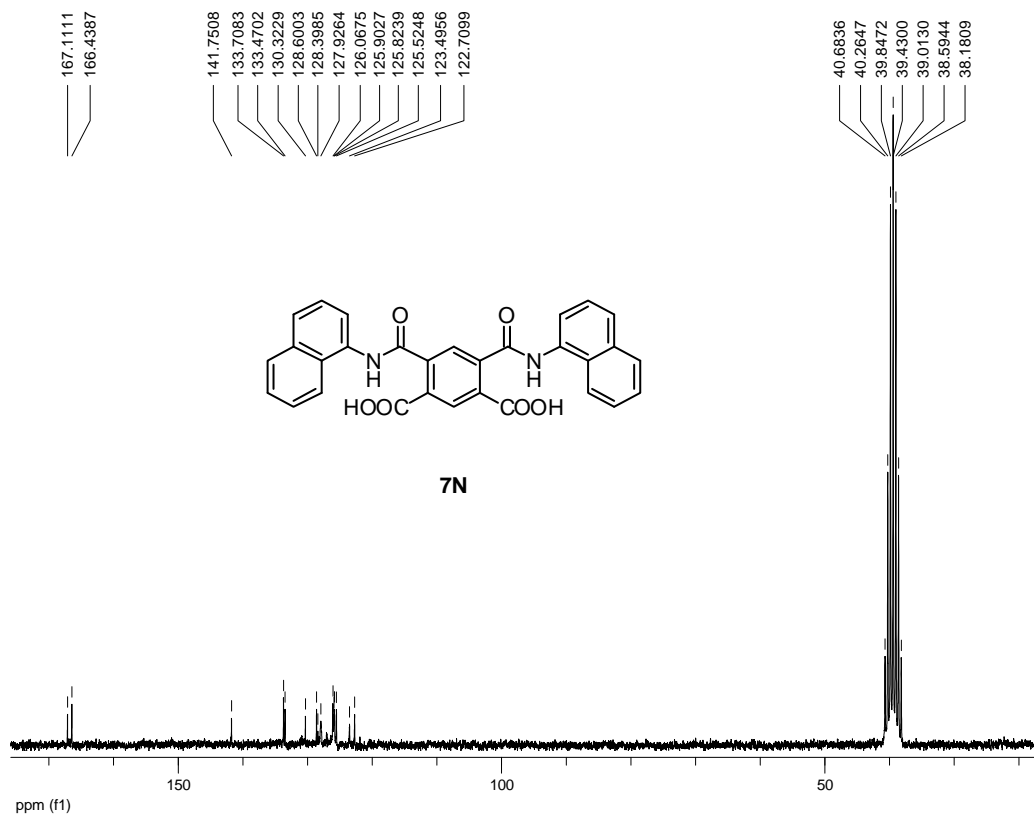

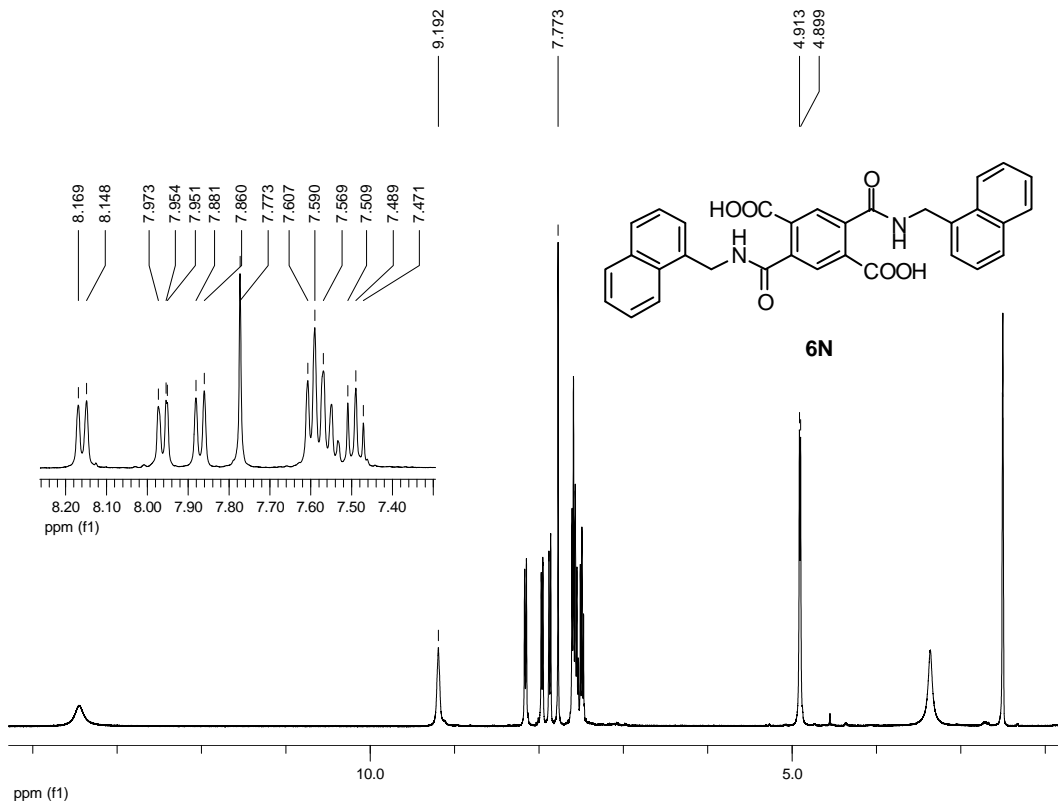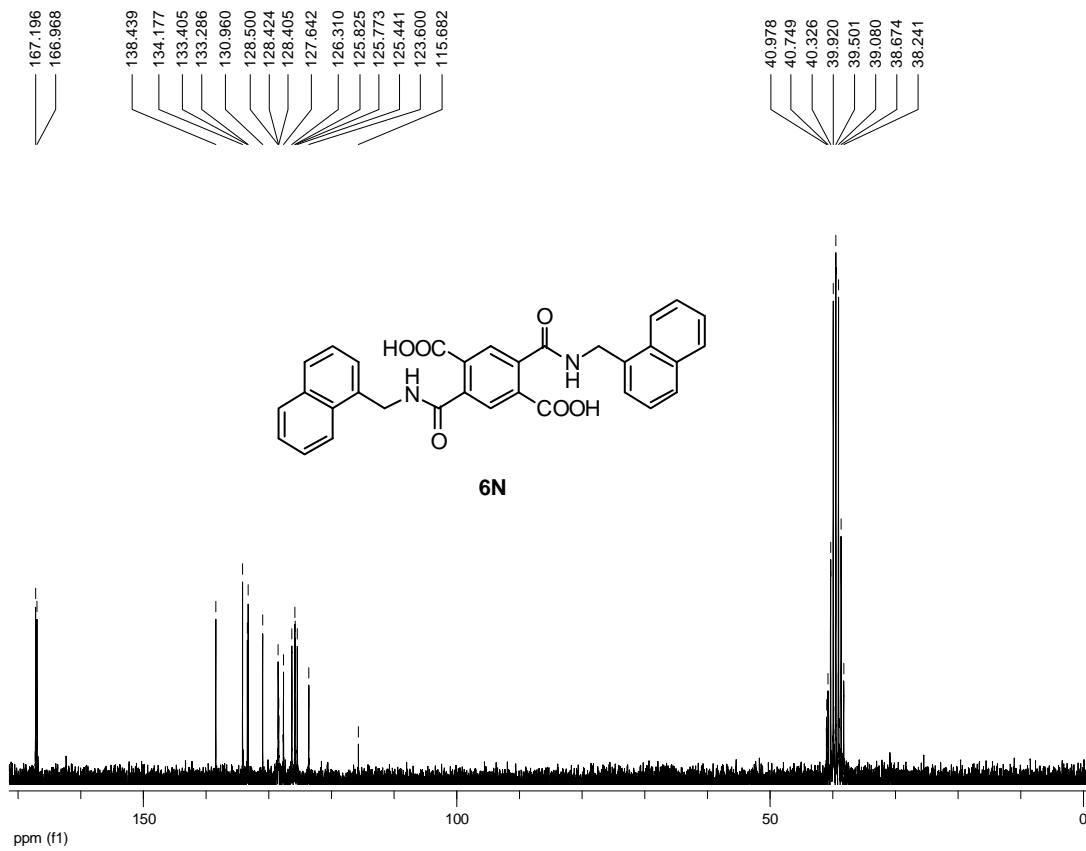

Supplement: f1 [file 725981.f1.pdf]
